# Supplementary material for: Cooperative Transcriptional Activation of Antimicrobial Genes by STAT and NF-κB Pathways by Concerted Recruitment of the Mediator Complex
Source: PubMed Central journal article supplement — Cell Rep. 2015 Jul 2;12(2):300–12. doi: 10.1016/j.celrep.2015.06.021 (PMC4521078; doi:10.1016/j.celrep.2015.06.021), 2015-07-02
Supplement: mmc1.pdf [file mmc1.pdf]

Cell Reports

Supplemental Information

**Cooperative Transcriptional Activation  
of Antimicrobial Genes by STAT and NF- $\kappa$ B Pathways  
by Concerted Recruitment of the Mediator Complex**

Sebastian Wienerroither, Priyank Shukla, Matthias Farlik, Andrea Majoros, Bernadette Stych, Claus Vogl, HyeonJoo Cheon, George R. Stark, Birgit Strobl, Mathias Müller, and Thomas Decker

**Figure S1**

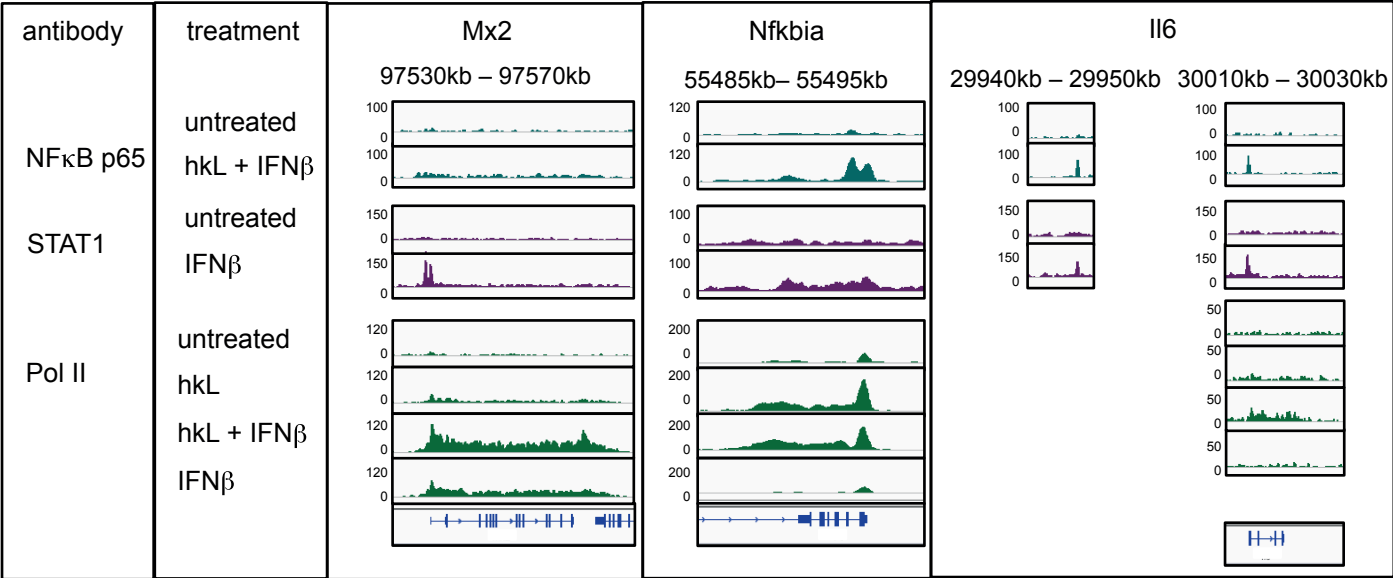

**Figure S2**

**a**

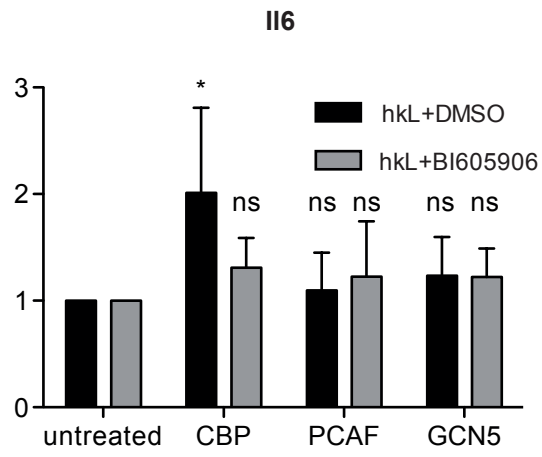

**b**

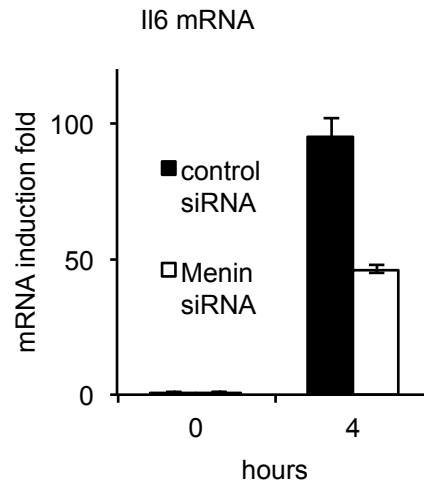

**c**

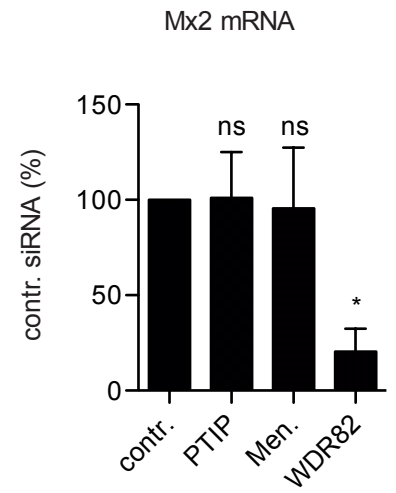

**d**

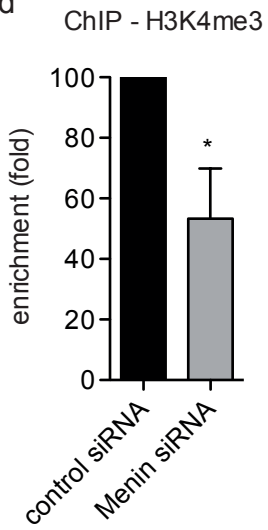

**e**

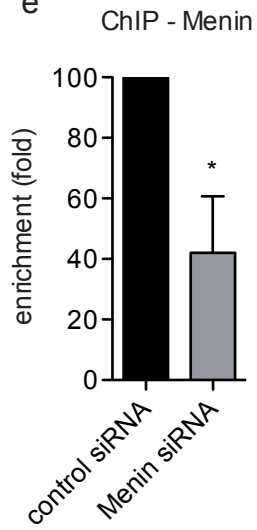

**f**

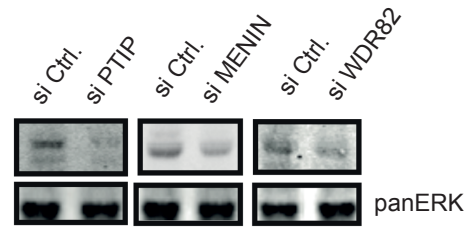

Figure S3

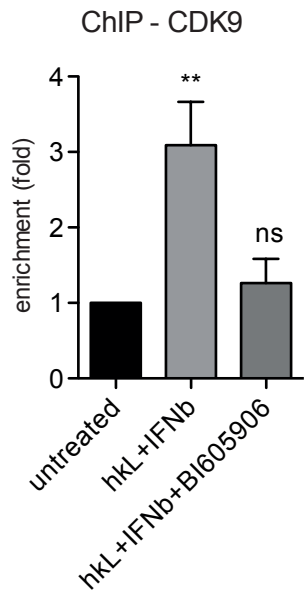

Figure S4

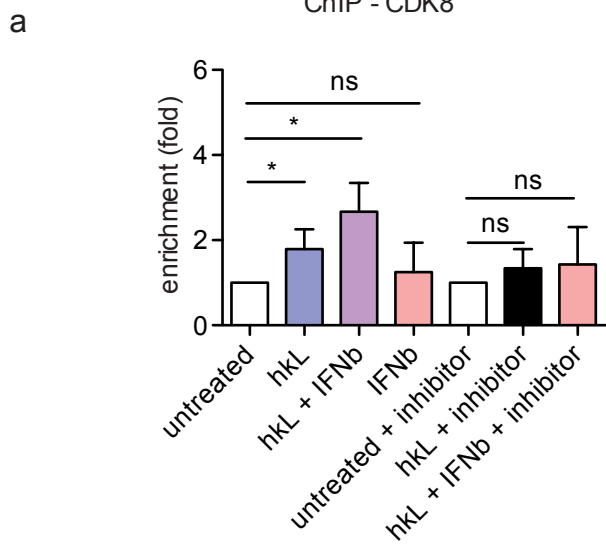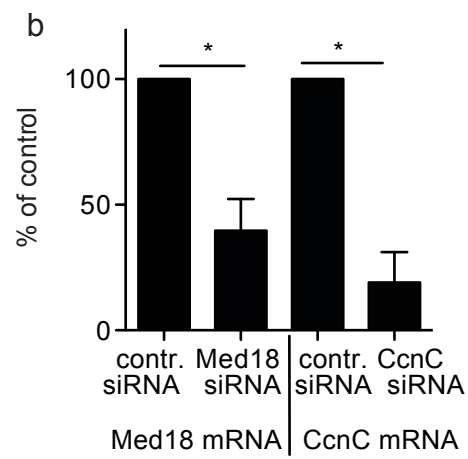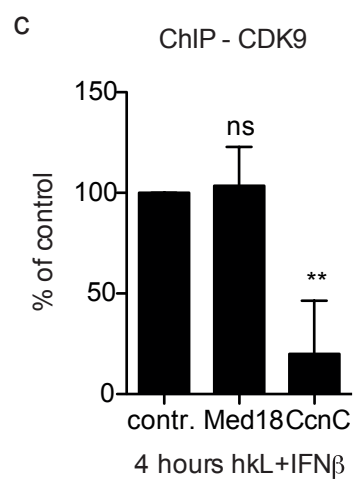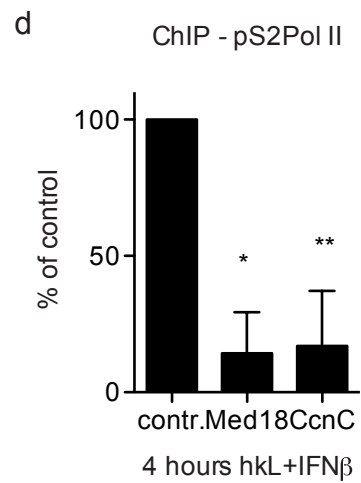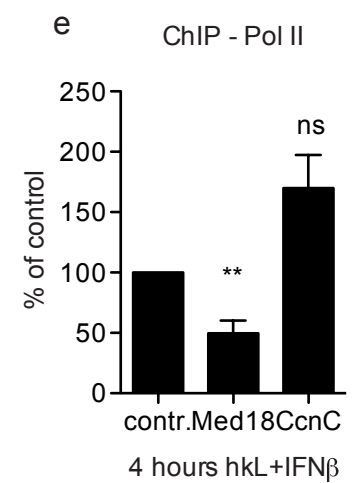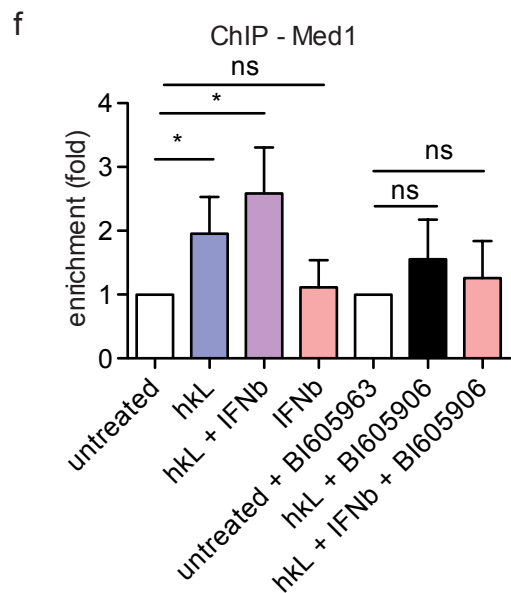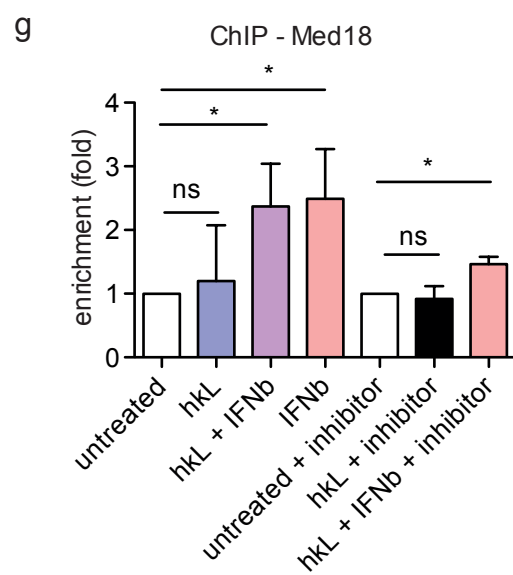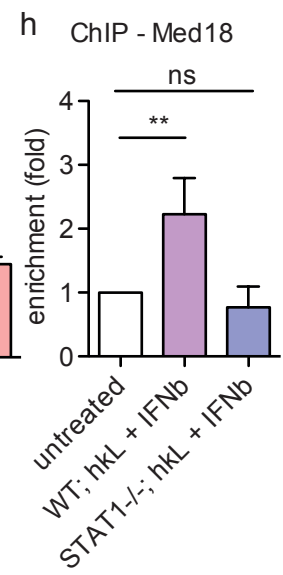

**Figure S5**

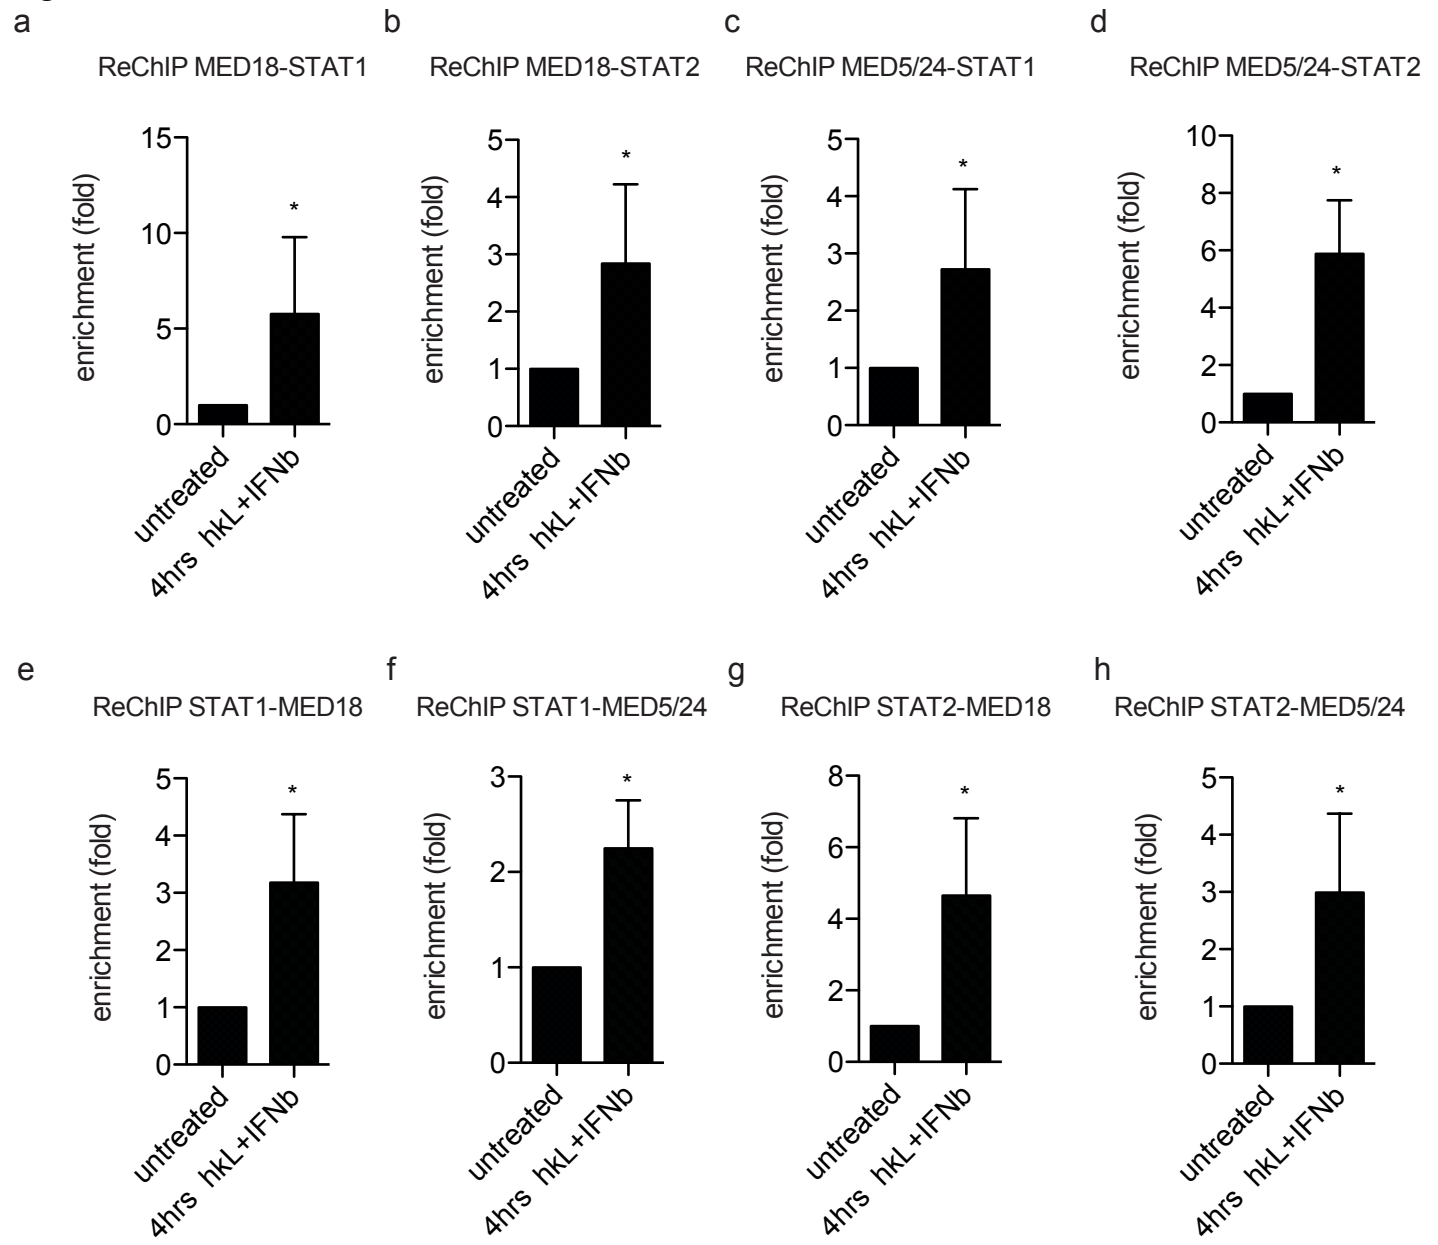

**Figure S6**

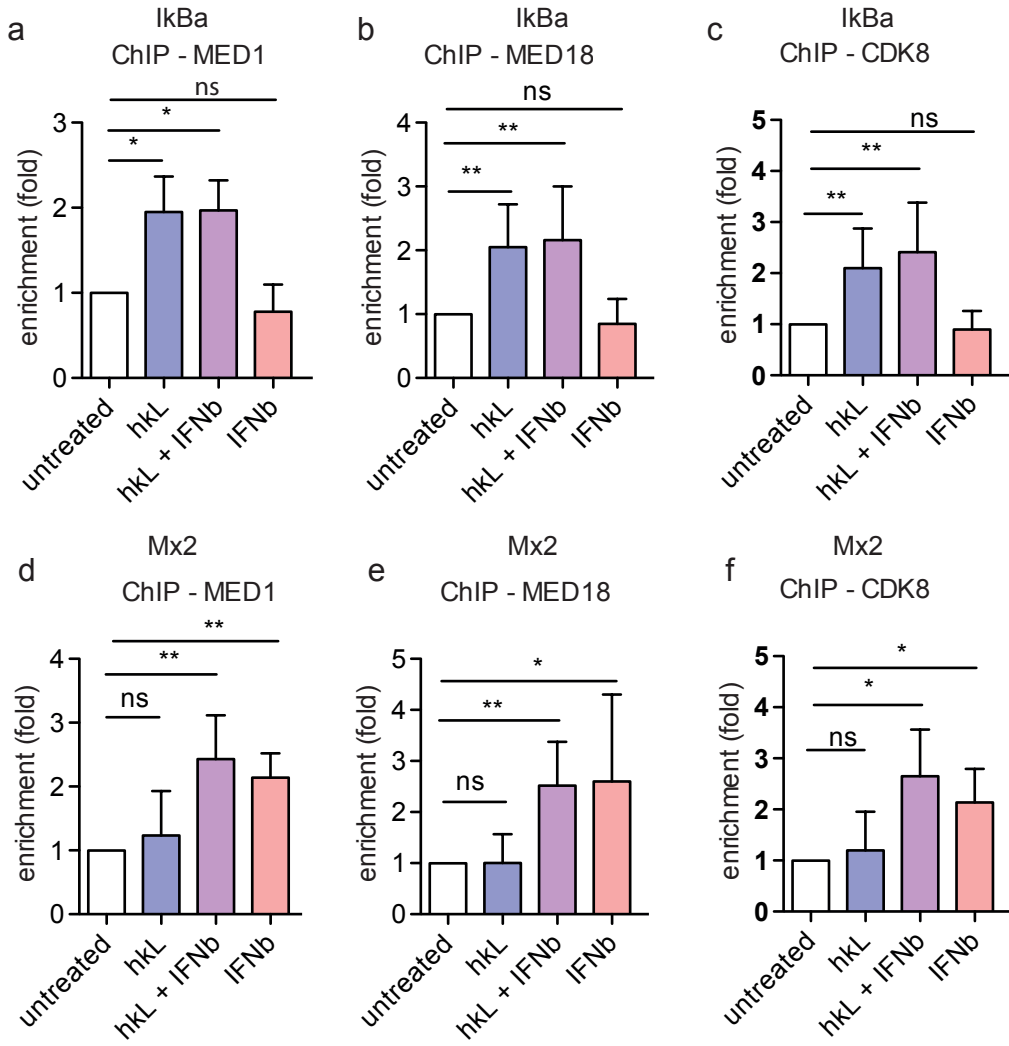

## Supplementary figure legends

### **Figure S1, related to figure 2: ChIP-Seq analysis NF $\kappa$ B and ISGF3 target genes.**

BMDMs were treated with heat-killed *Listeria* (hkL), IFN $\beta$ , or with a combination of both for 4 hours. For STAT1 ChIP treatment was with IFN $\beta$  for two hours. Cells were processed for ChIP with indicated antibodies (Pol II, NF $\kappa$ Bp65, STAT1), followed by next generation sequencing of the precipitate (ChIP-Seq). Genome browser views of the results obtained for the *Mx2* (left panel), *Nfkb1a* (middle panel) and *Il6* (right panel) genes are shown.

**Figure S2, related to figure 3: Histone modifiers at the *Il6* promoter.** (a) BMDMs were treated with hkL with or without 10 $\mu$ M IKK $\beta$  inhibitor BI605906 for 4 hours followed by ChIP with antibodies to CBP, PCAF and GCN5. DNA encompassing the TSS was amplified. (b-e) BMDM were transfected with Menin siRNA and treated with hkL+IFN $\beta$  for 4 hours. *Il6* (b) and *Mx2* (c) mRNA expression was analyzed by Q-PCR (b, c), H3K4me3 modification (d) and Menin binding (e) were determined by ChIP, amplifying the region encompassing the TSS. (f) western blot to assess the knock-down efficiency (right panel shows the quantification by densitometry).

**Figure S3, related to figure 4: CDK9 recruitment to the *Il6* promoter.** BMDMs were treated with hkL+IFN $\beta$  for 4 hours with (dark grey) or without (light grey) 10  $\mu$ M IKK $\beta$  inhibitor BI605906 followed by ChIP using antibody to CDK9. DNA encompassing the TSS was amplified

**Figure S4, related to figure 4, 5 and 6: Knockdown of MED18 and CcnC.** (a) WT BMDMs were treated with hkL or IFN $\beta$  or a combination of both for 4 hours, with and without 10  $\mu$ M IKK $\beta$  inhibitor BI605906 as indicated, followed by ChIP analysis with antibody to CDK8 and Q-PCR for promoter region of *Il6*. (b) Knockdown was performed in BMDMs using siRNA as described in material and methods. The cells were lysed and mRNA analysis (b) was performed to analyze the knockdown efficiency. A knockdown of MED18 or CcnC in BMDMs was performed and cells were treated with hkL and IFN $\beta$  for 4 hours followed by ChIP with antibodies to CDK9 (c), pS2Pol II (d) and Pol II (e). WT and STAT1  $-/-$  BMDMs were treated with hkL or IFN $\beta$  or a combination of both for 4 hours, with and without 10 $\mu$ M IKK $\beta$  inhibitor BI605906 as indicated, followed by ChIP analysis with antibody to MED1 (f) and MED18 (g, h) and Q-PCR for promoter region of *Il6*. For all ChIP experiments DNA encompassing the TSS was amplified. Values represent means and standard errors of at least three independent biological replicates. \*, P<0,05; \*\*, P<0,01; \*\*\*, P<0,001



**Figure S5, related to figure 6. ChIP-re-ChIP analysis of Stat1, Stat2 and core mediator binding to the Nos2 promoter.** WT BMDMs were treated with hκL and IFNβ for 4 hours, followed by ChIP with the antibodies to MED18 (a, b), MED5/24 (c, d), STAT1 (e, f), and STAT2 (g, h). The samples were re-precipitated with STAT1 (a, c), STAT2 (b, d), MED18 (e, g) and MED5/24 (f, h). The re-precipitates were analyzed by Q-PCR, amplifying the 209bp of the Nos2 promoter including the IFN response region (imperfect ISRE sequences at -952/-940 and -924/-911 with respect to the TSS).

**Figure S6, related to figures 4, 5 and 6: Mediator subunit recruitment to the IκBα and Mx2 genes.** BMDMs were treated with hκL+IFNβ for 4 hours followed by ChIP analysis with antibodies to MED1, MED18 and CDK8 (a,b). IκBα (a) and Mx2 proximal promoter regions (b) including the TSS were analyzed for protein binding. Values represent means and standard errors of at least four independent biological replicates. \*, P<0,05; \*\*, P<0,01; \*\*\*, P<0,001

| Gene          | NF $\kappa$ B binding site | STAT1 binding site |
|---------------|----------------------------|--------------------|
| 1190002H23Rik | -                          | -                  |
| 1190003J15Rik | -                          | -                  |
| Adora2b       | +                          | -                  |
| Arg2          | -                          | -                  |
| Ccl7          | +                          | +                  |
| Ccr12         | +                          | +                  |
| Cd40          | -                          | +                  |
| Cd83          | +                          | +                  |
| Ch25h         | +                          | +                  |
| Cxcl9         | -                          | +                  |
| Dgka          | -                          | -                  |
| Dusp2         | -                          | +                  |
| Edn1          | +                          | +                  |
| Egr1          | -                          | -                  |
| Gpr109a       | -                          | -                  |
| Hdc           | -                          | +                  |
| Il10          | +                          | +                  |
| Il15ra        | +                          | +                  |
| Il19          | -                          | -                  |
| Il1a          | -                          | -                  |
| Il1rn         | +                          | +                  |
| Il27          | +                          | +                  |
| Il6           | +                          | +                  |
| Indo          | -                          | -                  |
| Inhba         | +                          | -                  |
| Irf8          | -                          | +                  |
| Mxd1          | -                          | +                  |
| Nos2          | +                          | +                  |
| Nrg1          | -                          | +                  |
| Prokr1        | -                          | -                  |
| Ptx3          | -                          | -                  |
| S100a8        | -                          | -                  |
| Serpinb2      | -                          | +                  |
| Slamf1        | +                          | +                  |
| Slc28a2       | +                          | +                  |
| Slc6a4        | -                          | -                  |
| Tagap         | +                          | +                  |
| Thbs1         | -                          | -                  |
| Tmtc2         | +                          | +                  |
| Tpbp          | -                          | -                  |
| Upp1          | -                          | -                  |
| Vcam1         | -                          | -                  |

**Table S1, related to figures 1 and 2:** mRNAs displaying synergistic induction by type I IFN and heat-killed *Listeria* (hKL) as determined by microarray, related to figures 1 and 2. The presence of binding sites for NF $\kappa$ B/p65 and STAT1 within 50kB of the transcription start (TSS) of the corresponding genes was determined by ChIP-Seq. For further explanation see text.

a) Contingency tables were computed for the NF $\kappa$ B\_STAT1 pair, depending on the presence or absence of at least one CHIP-Seq peak 50kb upstream of the transcription start or within the gene, and on the presence or absence of at least 2-fold synergistic enrichment of Pol II with the double treatment versus single treatment samples.

| NF $\kappa$ B | STAT1   | Pol II syn. | Pol II not syn. | Total |
|---------------|---------|-------------|-----------------|-------|
| absent        | absent  | 103         | 26950           | 27053 |
| present       | absent  | 35          | 568             | 603   |
| absent        | present | 123         | 5964            | 6087  |
| present       | present | 127         | 1089            | 1216  |
| Total         |         | 388         | 34571           | 34959 |

b) Many hypotheses tests are possible with this table; the two used in the main text are presented. For genes with Pol II synergism, the presence or absence of NF $\kappa$ B and STAT1 peaks produce the following 2x2 contingency table:

|                       | STAT1 absent | STAT1 present | Total |
|-----------------------|--------------|---------------|-------|
| NF $\kappa$ B absent  | 103          | 123           | 226   |
| NF $\kappa$ B present | 35           | 127           | 162   |
| Total                 | 138          | 250           | 388   |

c) Analysis of genes without and with synergy for the presence or absence of concomitant NF $\kappa$ B and STAT1 peaks results in the following 2x2 contingency table:

|                                      | Pol II syn. | Pol II not syn. | Total |
|--------------------------------------|-------------|-----------------|-------|
| NF $\kappa$ B or STAT1 absent        | 261         | 33482           | 33743 |
| both NF $\kappa$ B and STAT1 present | 127         | 1089            | 1216  |
| Total                                | 388         | 34571           | 34959 |

**Table S2, related to figure 2.** Association of STAT1 and NF $\kappa$ B binding with synergistic gene induction by heat-killed *L. monocytogenes* and type I IFN.

**Table S3, related to figure 2:** GO-analysis and KEGG pathway of 127 genes with STAT1 and NF $\kappa$ B binding sites showing synergistic NF $\kappa$ B and ISGF3 activity according to RNA polymerase II signals in CHIP-Seq. Untreated cells are compared with cells subjected to single IFN $\beta$  or hkL treatment, or with cells treated with combined hkL+IFN $\beta$ .

| Antibody  | Catalog number                  | Company    |
|-----------|---------------------------------|------------|
| STAT1     | sc-346                          | Santa Cruz |
| CDK9      | sc-484                          | Santa Cruz |
| H3        | ab1791                          | Abcam      |
| H4ac      | 06-866                          | Upstate    |
| H4K5ac    | Kind gift from Christian Seiser |            |
| H4K8ac    | Kind gift from Christian Seiser |            |
| H4K12ac   | Kind gift from Christian Seiser |            |
| H4K16ac   | Kind gift from Christian Seiser |            |
| Med1      | sc-5334                         | Santa Cruz |
| Med4      | Ab129170                        | Abcam      |
| Med7      | sc-12457                        | Santa Cruz |
| CDK8      | sc-1521                         | Santa Cruz |
| Med18     | A300-777A                       | Bethyl     |
| Med24     | A301-472A                       | Bethyl     |
| Med26     | sc-48776                        | Santa Cruz |
| CcnC      | sc-1061                         | Santa Cruz |
| Pol II    | sc-899                          | Santa Cruz |
| pS2Pol II | A300-654A                       | Bethyl     |
| CBP       | sc-369                          | Santa Cruz |
| GCN5      | sc-20698x                       | Santa Cruz |
| PCAF      | sc-8999x                        | Santa Cruz |

**Table S4, related to figures 2-6.** Antibodies used for ChIP

Q-PCR

|           |                           |
|-----------|---------------------------|
| Nos2 for  | GCTTGCCCCAACAGGAGAAG      |
| Nos2 rev  | GCTGCCCGGAAGGTTTGTAC      |
| Il6 for   | CTGCAAGAGACTTCCATCCAG     |
| Il6 rev   | AGTGGTATAGACAGGTCTGTTGG   |
| Il1rn for | GTGCTACTGGGGCTCATTTGT     |
| Il1rn rev | GGAGTAAGAGGACACTTGCGAAT   |
| Ccl2 for  | CCCCGGACGATGAATATGATG     |
| Ccl2 rev  | CACCAAGATAAACACCGCCAG     |
| HPRT for  | GTTGGATACAGGCCAGACTTTGTTG |
| HPRT rev  | GAGGGTAGGCTGGCCTATTGGCT   |

ChIP

|                      |                             |
|----------------------|-----------------------------|
| Nos2 prx for         | GGTCCCAGTTTTGAAGTGACTIONACG |
| Nos2 prx rev         | GTTGTGACCCTGGCAGCAG         |
| Nos2 dis for         | CCAACACTATTGAGGCCACACAC     |
| Nos2 dis rev         | GCTTCCAATAAAGCATTACACA      |
| Mx2 for              | ACCCAGCCAAGGCCCCCTTA        |
| Mx2 rev              | GCAGCTGCCAGGGCTCAGAC        |
| IkBα for             | AAGAAGGGTTCTTGCAGAGGGCT     |
| IkBα rev             | TCGTCCTCCACTGAGAAGCCTAAA    |
| Il6 for              | ATCCAGTTGCCTTCTTGGGACTGA    |
| Il6 rev              | ATCAGTTTCACAGCCTACCCACCT    |
| Nos2 30kb distal for | CTGGAGTCTGTTCTTCTGACTG      |
| Nos2 30kb distal rev | CAAGAGGCCACAAGAGAAT         |

**Table S5, related to figures 1-6.** Primer sequences used for gene expression and ChIP analysis by Q-PCR in 5' -> 3' polarity
