# Supplementary material for: Cooperative Transcriptional Activation of Antimicrobial Genes by STAT and NF-κB Pathways by Concerted Recruitment of the Mediator Complex
Source: PubMed Central journal article supplement — Cell Rep. 2015 Jul 2;12(2):300–12. doi: 10.1016/j.celrep.2015.06.021 (PMC4521078; doi:10.1016/j.celrep.2015.06.021), 2015-07-02
Supplement: mmc3.pdf [file mmc3.pdf]

## Cooperative Transcriptional Activation of Antimicrobial Genes by STAT and NF- $\kappa$ B Pathways by Concerted Recruitment of the Mediator Complex

### Graphical Abstract

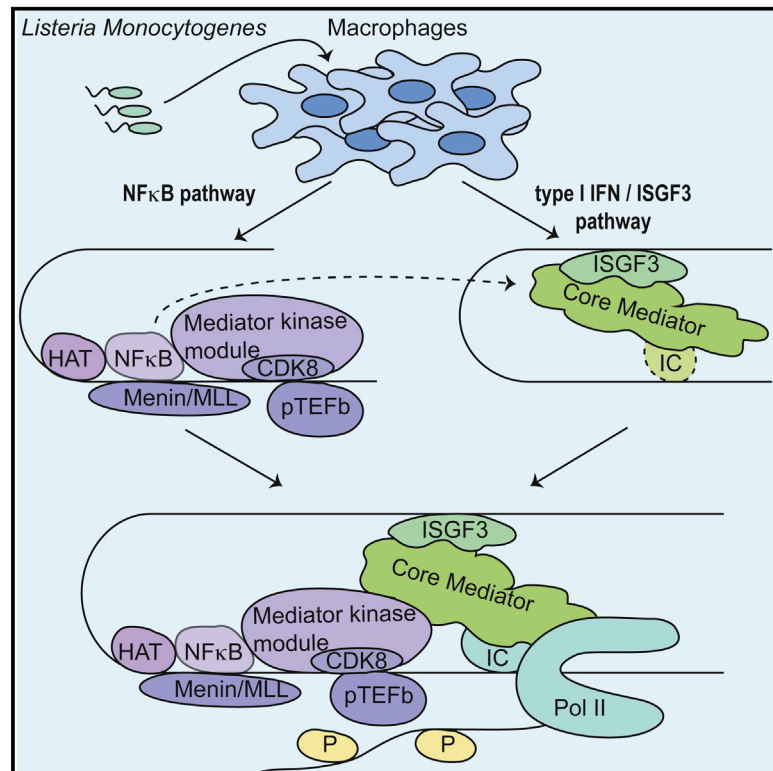

### Authors

Sebastian Wienerroither, Priyank Shukla, Matthias Farlik, ..., Birgit Strobl, Mathias Müller, Thomas Decker

### Correspondence

thomas.decker@univie.ac.at

### In Brief

Innate immunity requires transcriptional activation of antimicrobial genes. Wienerroither et al. show that the mediator, a multisubunit complex, serves as a hub for signal integration and cooperative transcriptional activation by two major antimicrobial signaling avenues, the STAT and NF- $\kappa$ B pathways.

### Highlights

- STAT-NF- $\kappa$ B cooperativity shapes the transcriptional response to infection
- NF- $\kappa$ B recruits RNA polymerase II kinase complexes and enzymes marking active chromatin
- NF- $\kappa$ B attracts the mediator kinase module, whereas STATs contact the core mediator
- STAT-NF- $\kappa$ B cooperation tethers a complete, functional mediator to antimicrobial genes

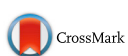

# Cooperative Transcriptional Activation of Antimicrobial Genes by STAT and NF- $\kappa$ B Pathways by Concerted Recruitment of the Mediator Complex

Sebastian Wienerroither,<sup>1</sup> Priyank Shukla,<sup>2</sup> Matthias Farlik,<sup>3</sup> Andrea Majoros,<sup>1</sup> Bernadette Stych,<sup>1</sup> Claus Vogl,<sup>2</sup> HyeonJoo Cheon,<sup>4</sup> George R. Stark,<sup>4</sup> Birgit Strobl,<sup>2</sup> Mathias Müller,<sup>2</sup> and Thomas Decker<sup>1,\*</sup>

<sup>1</sup>Max F. Perutz Laboratories, University of Vienna, Drive Bohr-Gasse 9, 1030 Vienna, Austria

<sup>2</sup>Institute of Animal Breeding and Genetics, University of Veterinary Medicine Vienna, Veterinärplatz 1, 1210 Vienna, Austria

<sup>3</sup>CeMM Research Center for Molecular Medicine of the Austrian Academy of Sciences, Lazarettgasse 14, 1090 Vienna, Austria

<sup>4</sup>Department of Cancer Biology, Lerner Research Institute, 9500 Euclid Avenue, Cleveland, OH 44195, USA

\*Correspondence: [thomas.decker@univie.ac.at](mailto:thomas.decker@univie.ac.at)

<http://dx.doi.org/10.1016/j.celrep.2015.06.021>

This is an open access article under the CC BY-NC-ND license (<http://creativecommons.org/licenses/by-nc-nd/4.0/>).

## SUMMARY

The transcriptional response to infection with the bacterium *Listeria monocytogenes* (Lm) requires cooperative signals of the type I interferon (IFN-I)-stimulated JAK-STAT and proinflammatory NF- $\kappa$ B pathways. Using ChIP-seq analysis, we define genes induced in Lm-infected macrophages through synergistic transcriptional activation by NF- $\kappa$ B and the IFN-I-activated transcription factor ISGF3. Using the *Nos2* and *IL6* genes as prime examples of this group, we show that NF- $\kappa$ B functions to recruit enzymes that establish histone marks of transcriptionally active genes. In addition, NF- $\kappa$ B regulates transcriptional elongation by employing the mediator kinase module for the recruitment of the pTEFb complex. ISGF3 has a major role in associating the core mediator with the transcription start as a prerequisite for TFIID and RNA polymerase II (Pol II) binding. Our data suggest that the functional cooperation between two major antimicrobial pathways is based on promoter priming by NF- $\kappa$ B and the engagement of the core mediator for Pol II binding by ISGF3.

## INTRODUCTION

Immune cells respond to microbial invaders such as the Gram-positive intracellular bacterium *Listeria monocytogenes* (Lm) with specialized gene expression profiles (Hamon et al., 2006; McCaffrey et al., 2004). Initial sensing of the microbe occurs by surface and endosomal Toll-like receptors (TLRs), whereas Lms escape from endosomal confinement to the cytoplasm causes the engagement of different cytoplasmic receptors to detect infection (Kawai and Akira, 2009; Mancuso et al., 2009; Sauer et al., 2011; Seki et al., 2002; Woodward et al., 2010). Collectively, these pattern recognition receptors (PRRs) activate an extensive network of signals, leading to NF- $\kappa$ B activation and the interferon regulatory factor (IRF)-

mediated synthesis of mRNA for type I interferons (IFN-I). IFN-I synthesis takes place exclusively upon recognition of cytosolic bacteria (O’Riordan and Portnoy, 2002; Stockinger et al., 2002). When escape from the phagosome is impeded, the NF- $\kappa$ B pathway is activated without IFN-I synthesis (Farlik et al., 2010).

The IFN-I receptor complex causes the phosphorylation of signal transducers and activators of transcription 1 (STAT1) and STAT2 by the receptor-associated Janus tyrosine kinases (JAK). The tyrosine-phosphorylated STATs form heterodimers and associate with IRF9 to form a trimeric complex, interferon-stimulated gene factor 3 (ISGF3). Depending on the promoter, ISGF3 may be both necessary and sufficient for the transcription of IFN-stimulated genes, or it may require input from additional signaling pathways (Levy and Darnell, 2002). A prominent example of a gene whose expression is strongly enhanced upon stimulation by an additional pathway is *Nos2*, which encodes inducible nitric oxide synthase (iNOS), a critical component of antibacterial defense (Bogdan, 2001; Farlik et al., 2010). In macrophages infected with Lm, IFN-I/ISGF3 and NF- $\kappa$ B synergize to stimulate the production of iNOS. During infection, NF- $\kappa$ B binds first to the *Nos2* promoter, converting the PRR signal into a transcriptional memory effect for the subsequent IFN-I-dependent deposition of ISGF3. NF- $\kappa$ B is necessary for the recruitment of TFIID and pTEFb, the complexes containing the RNA polymerase II (Pol II) kinases CDK7 and CDK9, whereas ISGF3 is essential for binding of the general transcription factor TFIID and Pol II (Farlik et al., 2010; Wienerroither et al., 2014).

The transcriptionally active state of a gene requires chromatin remodeling and modification as well as the phosphorylation of serines (S) within the Pol II carboxy-terminal domain (CTD). S5 phosphorylation by CDK7 is a prerequisite for promoter clearance and mRNA 5’ end processing, whereas CDK9 phosphorylation of the CTD at S2 is essential for subsequent mRNA elongation. Many groups have reported that the bromo and extra terminal (BET) family member Brd4 is involved in pTEFb recruitment, tethering the complex to transcriptional activators or acetylated histones or acting in the context of superelongation complexes (SECs) (Brasier et al., 2011; Jang

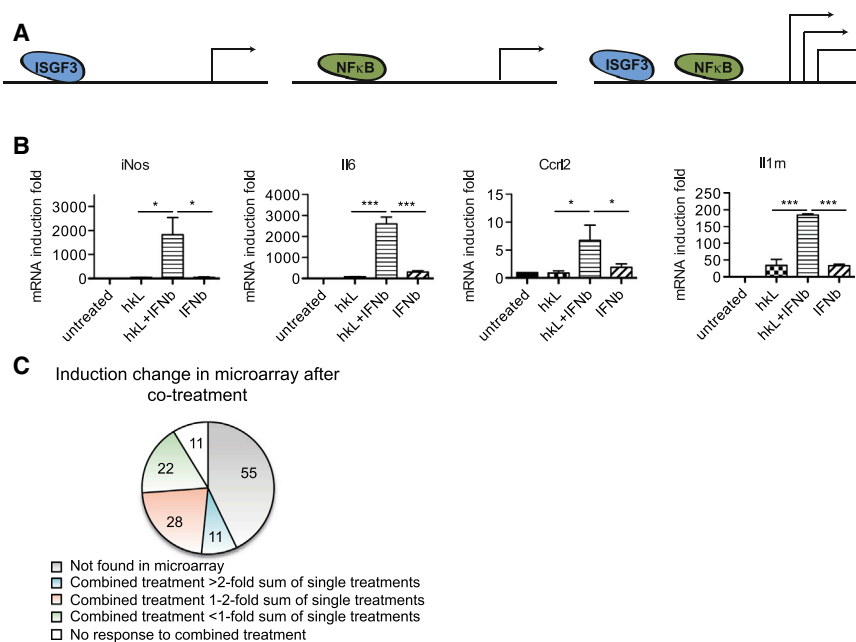

**Figure 1. Genes Co-regulated by Type I Interferons and the NF- $\kappa$ B Pathway in Macrophages Exposed to Heat-Killed *Listeria* and Type I IFN**

(A) Scheme depicting the scientific question.

(B) BMDMs were treated with hKL, IFN $\beta$  or a combination of both for 4 hr. Gene microarrays were performed, and selected genes showing synergistic induction by both stimuli were validated by qPCR.

(C) The distribution of 127 genes that were synergistically induced by hKL and IFN-I according to ChIP-seq Pol II signals with respect to fold change in microarray analysis. Values represent means  $\pm$  SE of three or more independent biological replicates.

\* $p < 0.05$ , \*\* $p < 0.01$ , \*\*\* $p < 0.001$ .

et al., 2005; Luo et al., 2012; Yang et al., 2005). pTEFb association with the *Nos2* promoter is unaffected by BET inhibition (Wienerroither et al., 2014), so recruitment of pTEFb to the *Nos2* promoter takes place by a different mechanism.

The kinase module of the mediator provides an alternative platform for pTEFb recruitment. The mediator is a multi-subunit protein complex that bridges transcription factors with Pol II and initiation and elongation factors (Conaway and Conaway, 2013; Malik and Roeder, 2010). Association with the kinase module containing the subunits MED12, MED13, cyclinC (CcnC), and CDK8 is dynamic and influenced by transcription factors interacting with the mediator core (Conaway and Conaway, 2013; Donner et al., 2010; Ebmeier and Taatjes, 2010; Malik and Roeder, 2010). The presence of the kinase module permits mediator association with transcriptional cofactors such as pTEFb (Donner et al., 2010; Ebmeier and Taatjes, 2010). The MED26 subunit has also been proposed to play a part in pTEFb binding. Takahashi and colleagues co-purified pTEFb with a complex containing MED26 and subunits shared with the SEC. The results suggest that the MED26-containing complex exchanges promoter-bound TFIID for pTEFb (Takahashi et al., 2011).

The interaction of the mediator and its kinase module with STATs has been little studied (Jamieson et al., 2012). CDK8 has recently been shown to regulate the activity of STAT1 dimers (Bancerek et al., 2013). Serrat et al. (2014) found LPS to enrich CDK8 at the *Nos2* promoter, an effect enhanced by histone deacetylase (HDAC) inhibition. Because HDAC inhibitors suppress *Nos2*, the authors propose that CDK8 negatively regulates *Nos2*.

We used chromatin immunoprecipitation sequencing (ChIP-seq) analysis to identify other genes that are subject to regulation by both NF- $\kappa$ B and ISGF3 in Lm-infected cells. We examined the role of the STAT and NF- $\kappa$ B pathways in the modification of

promoter chromatin and the modification of Pol II. We report essential roles for different portions of the mediator complex in the NF- $\kappa$ B-dependent deposition of pTEFb and in the ISGF3-dependent recruitment of Pol II. Our results provide

a mechanistic explanation for the interaction between the STAT and NF- $\kappa$ B pathways in the response to infection.

## RESULTS

### Genome-wide Search for Genes Co-regulated by the STAT and NF- $\kappa$ B Pathways

A recent microarray analysis indicated a significant number of genes synergistically induced by IFN-I/STAT and other pathways (Farlik et al., 2010). To further define this group of genes under the experimental conditions used throughout this study, bone marrow-derived macrophages (BMDMs) were treated with heat-killed *Listeria* (hKL, non-STAT pathways activated), IFN-I alone (only the IFN-I/STAT pathway activated), or both stimuli together. Genes induced under these conditions in microarrays were filtered for a synergy factor  $>2$ ; i.e., a more than 2-fold higher induction with both stimuli over the addition of each stimulus alone. 42 genes were identified, fulfilling this criterion (Table S1), and examples of these were validated by qPCR (Figure 1B). To determine whether synergistic induction with IFN-I reflected functional cooperativity with the NF- $\kappa$ B pathway, BMDMs were subjected to the same treatment, and chromatin immunoprecipitates with STAT1, NF- $\kappa$ B p65, or Pol II antibodies were sequenced. Around 1,200 genes had STAT1 and NF- $\kappa$ B bound above background levels within 50 kb of their annotated transcription start sites (TSSs). A comparison with the microarray analysis is shown in Figure 1C. 127 “synergy genes” with NF- $\kappa$ B and STAT1 binding sites were defined by  $\geq 2$ -fold Pol II binding within the 50-kb promoter region after hKL/IFN-I co-treatment compared with single treatment. 36 of these contained NF- $\kappa$ B and STAT1 peaks within 500 base pairs (bps) upstream of the TSS, such as the *IL6* gene (Figure S1). 11 genes (blue segment in Figure 1C; *Nos2*, *Il6*, *Ccl7*, *Ccl2*, *Cd83*, *Edn1*, *Il10*, *Il1rn*, *Il27*, *Slamf1*, and *Slc28a2*) showed a microarray synergy factor of  $>2$ , and 28 genes (orange

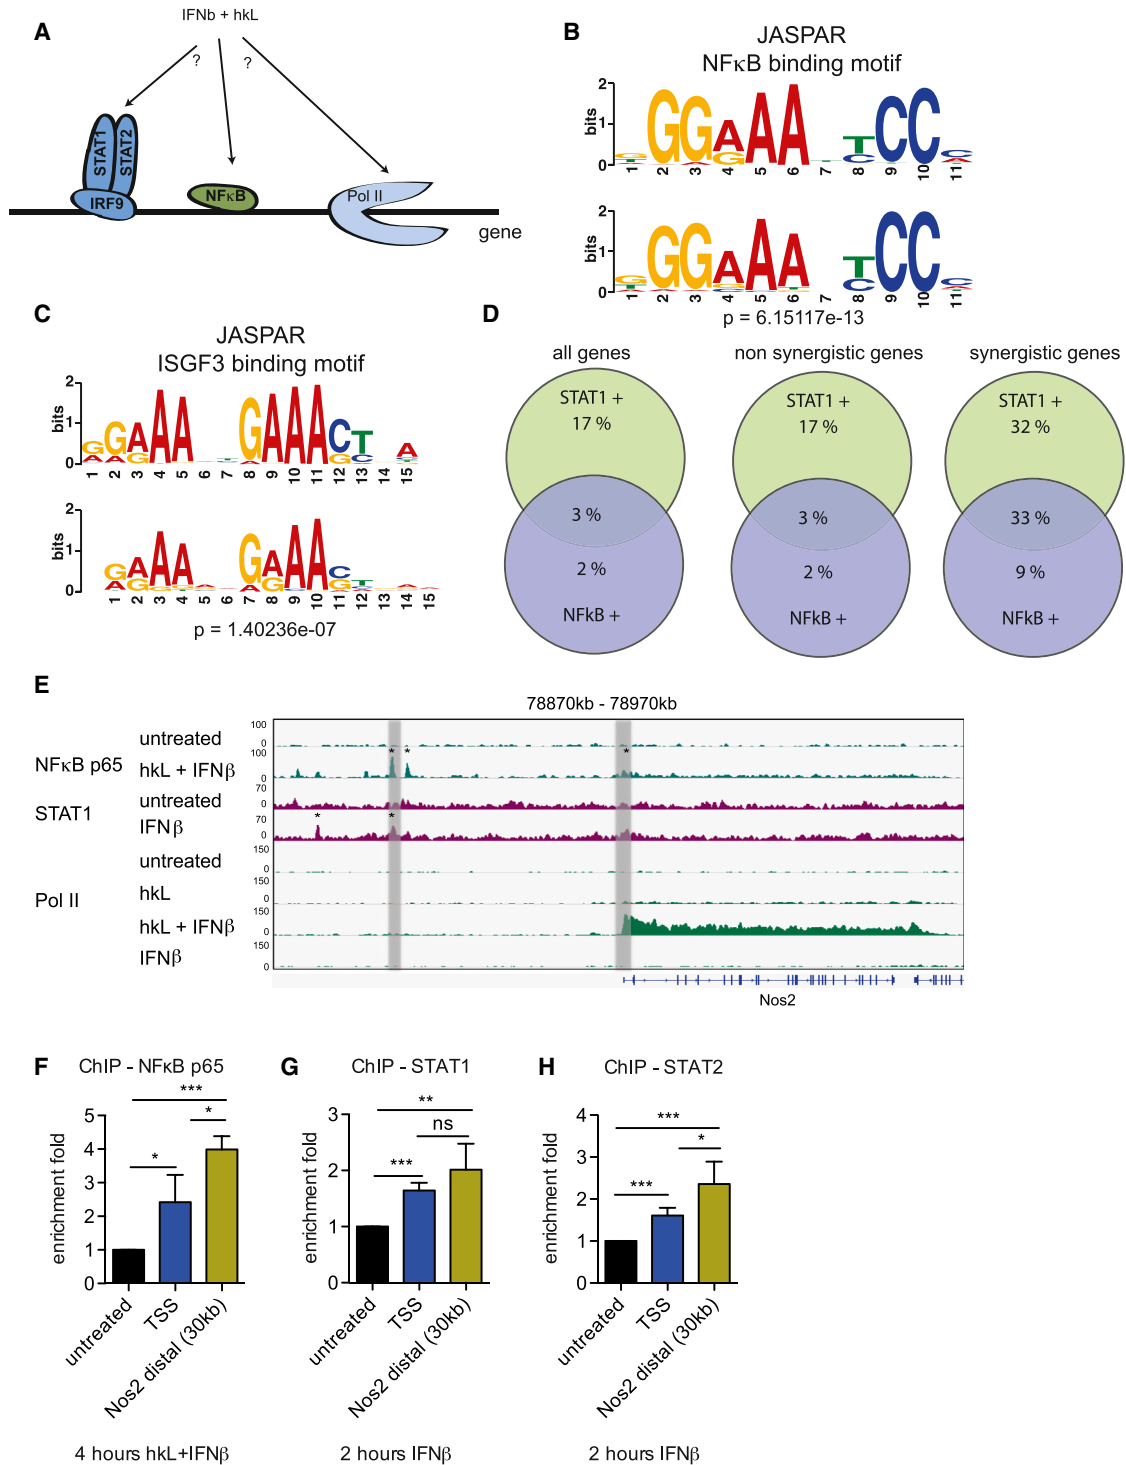

**Figure 2. Global Analysis of STAT1 and NF- $\kappa$ B Binding and Detection of Novel Binding Sites in the Nos2 Upstream Region**

(A) Scheme depicting the scientific question.

(B and C) Motif analysis of genomic sequences ChIPed (enriched) with (B) NF- $\kappa$ B p65 and (C) STAT1 antibodies. Shown at the bottom are the web logos of de novo computed motifs by DAVID from our ChIP-seq data. Shown at the top are the web logos of motifs present in the JASPAR database. The p value is the probability that the match between the two web logos occurred by random chance according to the null model, as computed by TOMTOM.

(D) Co-occurrence of STAT1 and NF- $\kappa$ B binding sites within 50 kB of TSSs of all genes (left), genes not synergistically induced by h $\kappa$ L/IFN $\beta$  cotreatment (center), or genes with synergistic cooperativity according to ChIP-seq pol II signals (right).

(legend continued on next page)

segment) showed synergy factors between 1- and 2-fold. 22 genes showed no added value of the co-treatment (Figure 1C, green segment), and 11 responded to one stimulus only (white segment). Together, the data define a group of genes under the synergistic control of the STAT and NF- $\kappa$ B pathways.

A search for overrepresented short motifs (Bailey et al., 2006) in genomic regions enriched by ChIP with an NF- $\kappa$ B-reactive antibody revealed as best hit a motif corresponding closely to the NF- $\kappa$ B binding motif in the JASPAR database (Figure 2B; Sandelin et al., 2004). For the STAT1-reactive antibody, the best hit corresponded to the ISGF3 binding motif (interferon stimulation response element [ISRE]; Figure 2C). Among genes with significant STAT1 peaks in the 50-kb upstream region (including gene coordinates), we found slightly more  $\gamma$  interferon activation sites (GASs) than ISRE motifs (59% and 53%, respectively). Among genes with significant STAT2 peaks, we also found 59% with GAS sites but more with ISRE sites (65%).

A genome-wide analysis of STAT1 and NF- $\kappa$ B peaks in genes and the relationship to transcriptional activity is shown in Figure 2D and Table S2A. Venn diagrams indicate the individual or combined occurrence of STAT1 and NF- $\kappa$ B binding sites within 50 kb upstream of a TSS, either for all genes (Figure 2D, left), those that do not show synergy of Pol II binding after hKL + IFN $\beta$  treatment (center), and those that show synergistic Pol II association (right). Of the genes that are synergistic, 42% have NF- $\kappa$ B peaks. The majority of these (78%) also contain STAT1 peaks, a highly significant overrepresentation ( $p = 1.97e-6$ ; Table S2B). The fraction of genes with STAT1 peaks in this group is larger (65%), in keeping with the dominance of the Jak-STAT pathway in the transcriptional response to IFN. Similarly, synergistic genes are significantly enriched for peaks of both NF- $\kappa$ B and STAT1 jointly compared with all other genes ( $p = 2.2e-16$ ; Table S2C).

Surprisingly, binding of both NF- $\kappa$ B and STAT1 to the *Nos2* promoter sites mapped previously by transient transfection (Kleinert et al., 2004) and ChIP (Farlik et al., 2010) was very weak. This includes an NF- $\kappa$ B site at  $-86/-76$  and an IFN response region with imperfect ISRE sequences at  $-952/-940$  and  $-924/-911$  with respect to the TSS (contained within the Chr11:78915 kb–78925 kb region in Figure 2E; the TSS corresponds to nucleotide 78920787). Stronger binding of both NF- $\kappa$ B and STAT1 occurred approximately 30 kb upstream of the *Nos2* TSS (chr11:78870 kb–78890 kb). A search for NF- $\kappa$ B and STAT binding sites in the *Nos2* gene body and 50 kb upstream sequence based on position weight matrices from the JASPAR database revealed consensus NF- $\kappa$ B sequences slightly downstream of the TSS and two peaks in the distal enhancer (marked with an asterisk in Figure 2E). Furthermore, this algorithm identified ISRE consensus sequences in two STAT1 peaks of the distal enhancer (see asterisks). At the

stringency set for this search, neither the upstream NF- $\kappa$ B element nor the putative ISRE sequences at  $-952/-940$  and  $-924/-911$  showed up as consensus elements, consistent with weak STAT1 binding. Furthermore, two consensus ISREs corresponded to regions without any apparent STAT1 association. Likewise, NF- $\kappa$ B consensus elements without corresponding ChIP-seq peaks were found.

NF- $\kappa$ B, STAT1, and STAT2 binding to the distal enhancer was confirmed by site-directed ChIP and found to be stronger than binding to the promoter-proximal sites indicated above (Figures 2F–2H). The region amplified in the distal enhancer is within the shaded area of Figure 2E and contains both NF- $\kappa$ B and STAT1 ChIP-seq peaks (corresponding to chr11:78886608–78886847 or  $-34179/-33939$  with respect to the TSS). Interestingly, the *IL6* promoter also contained a far upstream enhancer with NF- $\kappa$ B and STAT1 binding sites (29940 kb–29950 kb in Figure S1), in agreement with a recent report (Qiao et al., 2013). The control ISG Mx2 showed no p65 binding but a strong STAT1 peak, whereas the NF- $\kappa$ B target control *Nfkb1a* showed a prominent promoter-proximal p65 binding site but no binding of STAT1 (Figure S1).

Gene ontology (GO) analysis was performed using DAVID (Jiao et al., 2012) on the 127 STAT1/NF- $\kappa$ B-p65 synergy genes. Significantly enriched ( $p < 0.05$ ) GO terms clustered into the following categories: innate immune response, adaptive immune response, apoptosis, regulation of immune response, part of the extracellular region, and cytokine/chemokine activity (Table S3). Analysis of the same gene group for Kyoto Encyclopedia of Genes and Genomes (KEGG) pathways produced the Jak-STAT pathway as the second-most overrepresented pathway (Table S3), with many other genes being clearly linked to pathways relevant for innate immunity. In summary, these findings indicate that the interaction between ISGF3 and NF- $\kappa$ B in transcriptional control of functionally interlinked genes supports cell-based innate immunity to bacterial infection.

#### Histone 4 Acetylation at the *Nos2* Promoter Occurs via NF- $\kappa$ B-Dependent HAT Recruitment

The *Nos2* gene was further analyzed as a paradigm for the interplay of the IFN-I and NF- $\kappa$ B pathways in transcriptional regulation. Critical findings were confirmed with the *IL6* gene, another member of the “synergy group.”

Our first aim was to analyze histone modifications of active promoters. First, global histone 4 acetylation (H4ac) after Lm infection in nucleosomes proximal to the TSS was examined (Figure 3B). Acetylation of histone 4 lysine 5 (H4K5), histone 4 lysine 8 (H4K8), histone 4 lysine 12 (H4K12), and histone 4 lysine 16 (H4K16) occurred after treatment of BMDMs with hKL alone (solid

(E) BMDMs were treated with hKL, IFN $\beta$ , or a combination of both for 4 hr. For STAT1, ChIP treatment was with IFN $\beta$  for 2 hr. Cells were processed for ChIP with the indicated antibodies (Pol II, NF- $\kappa$ B p65, and STAT1), followed by next-generation sequencing of the precipitate. Genome browser views of the ChIP-seq results obtained for *Nos2* are shown with a scale of mapped reads. Shaded areas indicate the promoter-proximal region and distal enhancer-containing NF- $\kappa$ B and IFN response elements. Asterisks mark ChIP binding sites with coinciding NF- $\kappa$ B or ISRE consensus sequences as identified by motif search algorithms. For detailed information, see text.

(F–H) BMDMs were treated for 4 hr with a combination of hKL and IFN $\beta$  (F) or for 2 hr with IFN $\beta$  (G and H). NF- $\kappa$ B p65 (n = 3) (F), STAT1 (n = 3) (G), and STAT2 (n = 5) binding (H) to proximal promoter regions containing the NF- $\kappa$ B site or the IFN-responsive regions or the shaded distal region indicated in Figure 2E was measured by ChIP. In the distal region, a 240-bp fragment (chr11: 78886608–78886847) containing ChIP peaks for both NF- $\kappa$ B and STAT1 was amplified. Values represent mean and SE of at least three independent biological replicates. \* $p < 0.05$ , \*\* $p < 0.01$ , \*\*\* $p < 0.001$ , ns, not significant.



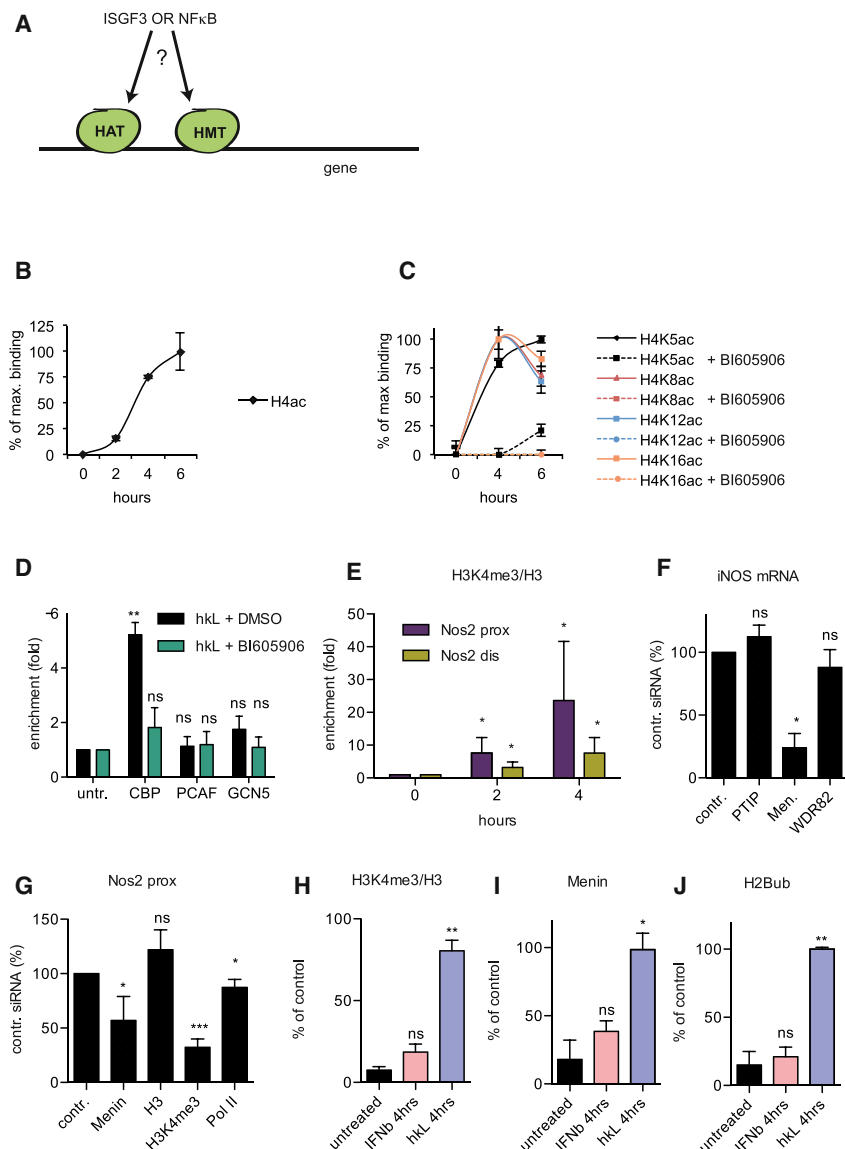

**Figure 3. Recruitment of Histone Modifiers and the Establishment of Histone Modifications by Heat-Killed *Listeria* and IFN $\beta$**

(A) Scheme depicting the scientific question. HMT, histone methyl transferase.

(B) BMDMs were infected with Lm for the indicated time, followed by ChIP with antibodies to acetyl-H4. (C) BMDMs were treated with hKL for the indicated time in the presence (dashed line) or absence (solid line) of the IKK $\beta$  inhibitor BI605906 (10  $\mu$ M), followed by ChIP with antibodies to the acetylated H4 lysines H4K5ac, H4K8ac, H4K12ac, and H4K16ac and amplification of the proximal Nos2 promoter, including the TSS.

(D) BMDMs were treated as described in (C) for 4 hr, followed by ChIP with antibodies to the histone acetyl transferases CBP, PCAF, and GCN5 (n = 3). untr., untreated.

(E) BMDMs were infected with Lm for the indicated time (n = 2). Deposition of the H3K4me3 mark at the distal and proximal Nos2 promoter was determined by ChIP.

(F and G) BMDMs were transfected with the indicated siRNAs to inhibit the expression of essential subunits of the Set1A-B, MLL1-2, or MLL3-4 methyltransferase complexes. Transfected cells were treated with hKL + IFN $\beta$  for 4 hr. The cells were assayed for synthesis of Nos2 mRNA by qPCR (n = 2) (F) and for the recruitment of Menin and Pol II or the establishment of the H3K4me3 mark by ChIP (n = 3) at the Nos2 promoter (G). The data in (G) represent percent binding compared with cells transfected with control (contr.) siRNA. H3 binding was measured as a negative control.

(H–J) BMDMs were treated with hKL or IFN $\beta$  for 4 hr. H3K4me3 (n = 2) (H), Menin (n = 2) recruitment (J), and H2B ubiquitination (n = 2) (K) were determined by ChIP. All ChIP experiments with antibodies to a histone modification were additionally normalized to total histone 3 levels.

Values represent mean and SE of at least three independent biological replicates. \*p < 0.05, \*\*p < 0.01, \*\*\*p < 0.001.

lines in Figure 3C) and was reduced by the simultaneous inhibition of NF- $\kappa$ B activation by the IKK $\beta$  inhibitor BI605906 (Figure 3C, dashed lines). To identify histone acetyltransferases (HATs) responsible for proximal promoter acetylation, hKL-induced binding of PCAF, CBP, and GCN5 was analyzed. PCAF and GCN5 showed very low enrichment, whereas robust, BI605906-sensitive recruitment was observed for CBP (Figure 3D). The data demonstrate NF- $\kappa$ B-dependent CBP recruitment at the Nos2 and Il6 (Figure S2A) genes. They favor the hypothesis that active chromatin at these genes in hKL-treated macrophages requires CBP activity, not ruling out a contribution of other HATs.

**NF- $\kappa$ B Signaling Causes the Appearance of the H3K4me3 Chromatin Mark at the Proximal Nos2 Promoter**

Another hallmark of transcriptionally active genes is the deposition of a histone 3 lysine 4 trimethylation (H3K4me3) mark at

nucleosomes close to the TSS. Reportedly, the Taf3 subunit binds to H3K4me3 to aid TFIID binding (Lauberth et al., 2013; Vermeulen et al., 2007). Lm infection induced H3K4me3 proximal to the Nos2 TSS and, weaker, at the proximal IFN response region (Figure 3E). Mammalian H3K4me3 methylase complexes are distinguished by, respectively, WDR82 (Set1 A-B/COMPASS-like), Menin (MLL1-2/COMPASS-like), or PTIP subunits (MLL3-4/COMPASS-like; Shilatifard, 2012; Smith et al., 2011). Small interfering RNA (siRNA)-mediated knock-down of individual subunits revealed a prominent role of the Menin-containing complex for transcriptional induction of Nos2 and Il6 by hKL/IFN $\beta$  treatment (Figure 3F; Figure S2B). In contrast, expression of the NF- $\kappa$ B-independent ISGF3 target Mx2 was suppressed by WDR82 siRNA but not by Menin targeting (Figure S2C), suggesting activity of Set1 A-B/COMPASS-like methyl transferases. Menin siRNA decreased both Menin binding and the H3K4me3 mark at the proximal

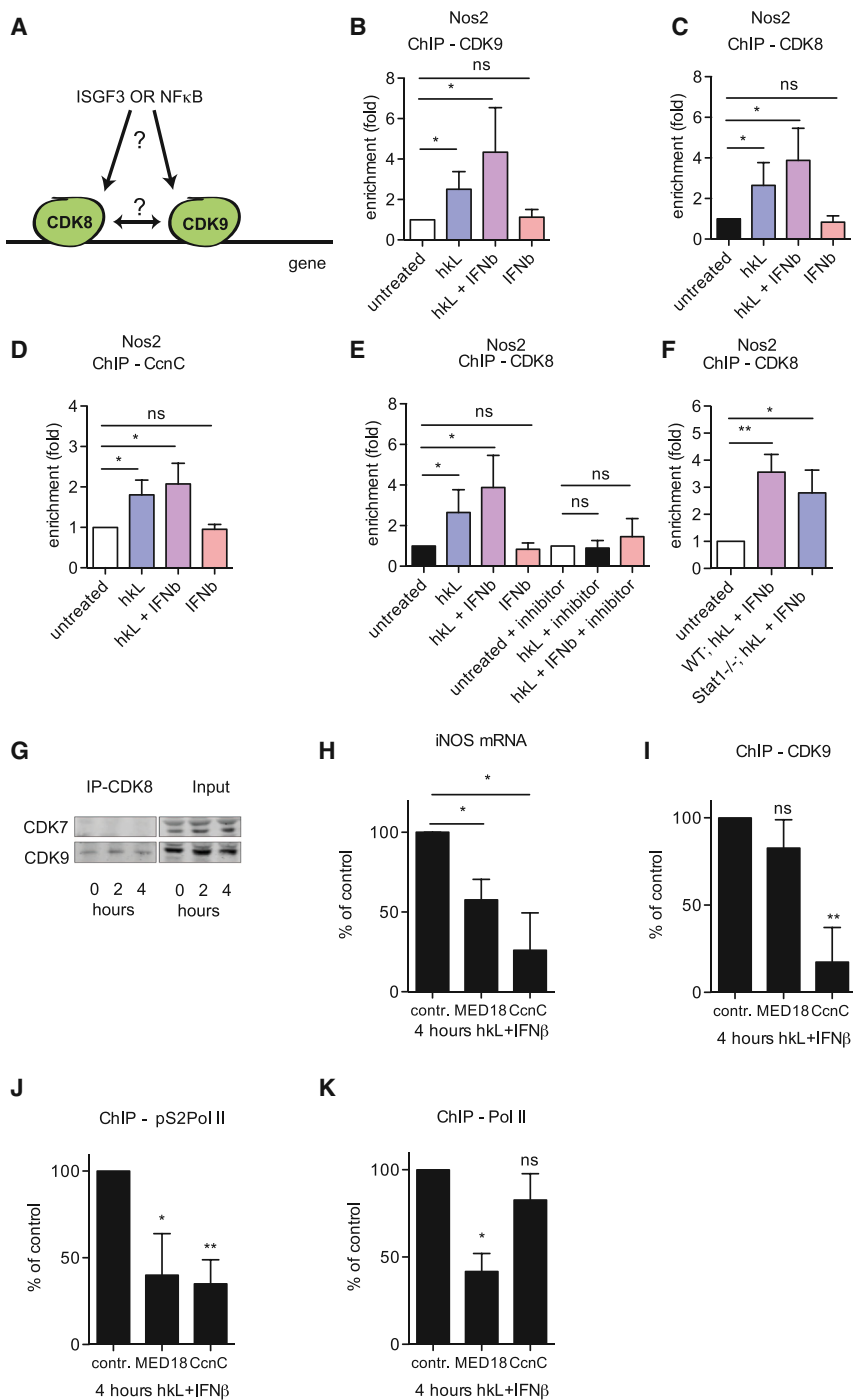

**Figure 4. CDK9 Recruitment by the Mediator Kinase Module**

(A) Scheme depicting the scientific question. (B–D) BMDMs were treated with hL or IFN $\beta$  or a combination of both, followed by ChIP analysis with antibodies to CDK9 (B), CDK8 (C), or CcnC (D).

(E and F) WT and Stat1 $^{-/-}$  BMDMs were treated with hL, IFN $\beta$ , or a combination of both, for 4 hr with and without 10  $\mu$ M IKK $\beta$  inhibitor BI605906 as indicated, followed by ChIP analysis with antibody to CDK8 and qPCR for the proximal Nos2 promoter, including the TSS.

(G) BMDMs were treated for 2 or 4 hr with hL + IFN $\beta$ , followed by cell lysis and precipitation for CDK8 protein. Samples were loaded on an SDS-PAGE gel, and antibodies to CDK7 and CDK9 were used in a western blot to analyze the interaction with CDK8.

(H–K) Knockdown of MED18 or CcnC was performed in BMDMs. (H) The cells were treated with hL and IFN $\beta$  for 4 hr, followed by mRNA extraction and qPCR for Nos2 expression. Additionally, cells were analyzed by ChIP with antibodies to CDK9 (I), pS2Pol II (J), or Pol II (K). Enrichment fold values at the proximal Nos2 promoter for the control siRNA samples were as follows: CDK9, 2.7; pS2Pol II, 3.31; Pol II, 4.1.

Values represent means  $\pm$  SE of three or more independent biological replicates. \* $p$  < 0.05, \*\* $p$  < 0.01, \*\*\* $p$  < 0.001.

pathway mediates both H2Bub and H3K4me3 modifications (Figure 3J). The data therefore suggest that NF- $\kappa$ B recruits the machinery for Nos2 and Il6 H3K4 trimethylation.

**Mediator Kinase Module Recruits CDK9 to the Nos2 Promoter**

pTEFb/CDK9 association with the Nos2 promoter is Brd4-independent but requires NF- $\kappa$ B (Wienerroither et al., 2014). To identify the pTEFb/CDK9 recruitment mechanism, pTEFb interaction with CDK8 and the mediator kinase module was examined (Donner et al., 2010). In BMDMs, binding of CDK9 or of CDK8 and its regulatory subunit CcnC to a region encompassing the Nos2 (Figures 4B–4E) or Il6 (Figure S3) TSS followed the same pattern. It was stimulated by

hL, not by IFN $\beta$ , and both stimuli together produced a slight, statistically insignificant increase over hL alone (Figures 4B–4D; Figure S3). CDK8 binding was sensitive to IKK $\beta$  inhibition (Figure 4E) and largely unperturbed by Stat1 deficiency (Figure 4F). CDK8 binding to the Il6 gene was less robust but occurred under the same conditions (Figure S4A). Consistent with the presence of these proteins in a common complex, CDK8 and CDK9 were co-immunoprecipitated from BMDM

Nos2 and Il6 promoters (Figure 3G; Figures S2D and S2E). Consistently, the appearance of Menin and H3K4me3 showed similar kinetics, and both were stimulated by hL but not by IFN $\beta$  treatment (Figures 3H and 3I). Monoubiquitination of H2B (H2Bub) is a frequent prerequisite for H3K4 trimethylation (Soares and Buratowski, 2013). Like Menin and H3K4me3, this modification was established by hL treatment alone, suggesting that the NF- $\kappa$ B

hL, not by IFN $\beta$ , and both stimuli together produced a slight, statistically insignificant increase over hL alone (Figures 4B–4D; Figure S3). CDK8 binding was sensitive to IKK $\beta$  inhibition (Figure 4E) and largely unperturbed by Stat1 deficiency (Figure 4F). CDK8 binding to the Il6 gene was less robust but occurred under the same conditions (Figure S4A). Consistent with the presence of these proteins in a common complex, CDK8 and CDK9 were co-immunoprecipitated from BMDM

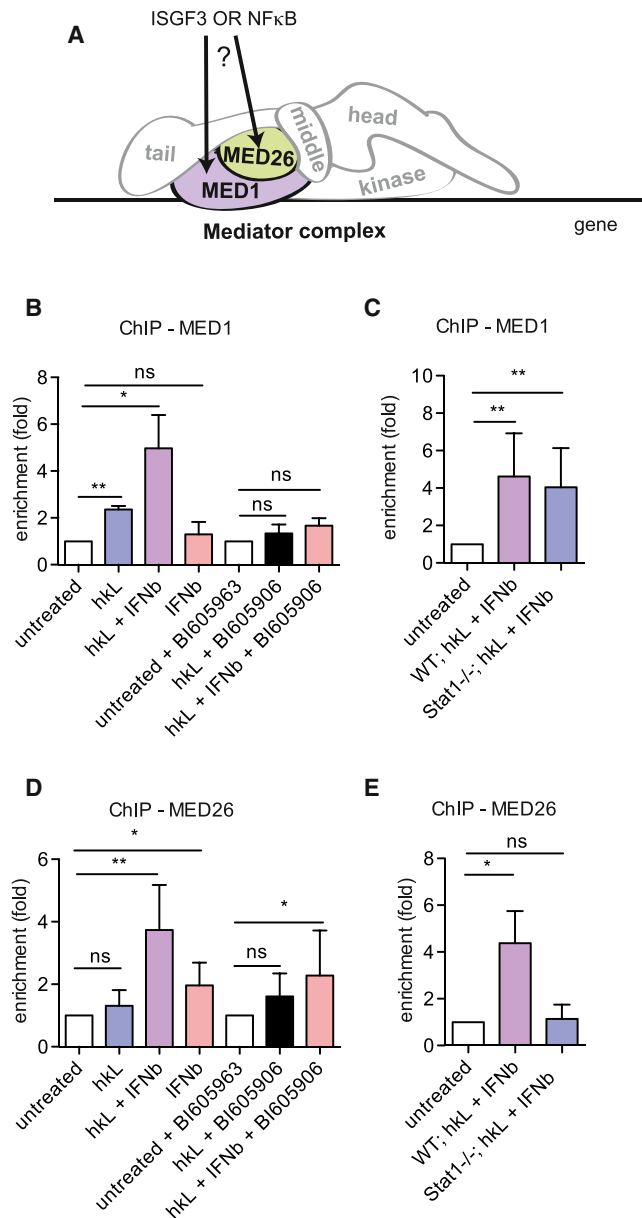

**Figure 5. Association of the Mediator Subunits MED1 and MED26 with the *Nos2* Promoter**

(A) Scheme depicting the scientific question.

(B–E) WT or Stat1<sup>-/-</sup> BMDMs were treated with hκL, IFNβ, or a combination of both with or without 10 μM IKKβ inhibitor for 4 hr. The cells were processed for ChIP with antibodies to MED1 (B and C) or MED26 (D and E). Enrichment at the proximal *Nos2* promoter/TSS was analyzed by qPCR. Values represent means ± SE of four or more independent biological replicates. \*p < 0.05, \*\*p < 0.01, \*\*\*p < 0.001.

lysates, particularly after hκL/IFNβ treatment (Figure 4G). The lack of interaction between CDK7 and CDK8 is shown as a control.

CcnC siRNA and, as a control, MED18 siRNA were used to verify the importance of the CDK8/CcnC pair for CDK9 recruitment. Both CcnC and MED18 siRNAs caused an approximately

50% reduction of *Nos2* mRNA induction by combined hκL/IFNβ treatment (Figures 4H and S4B). Consistent with a role of CDK8/CcnC in CDK9 recruitment, CcnC siRNA, but not MED18 siRNA, reduced CDK9 association with *Nos2* in hκL/IFNβ-treated BMDMs (Figure 4I). Accordingly, CcnC knockdown specifically abrogated S2 phosphorylation of the Pol II CTD (Figure 4J). By contrast, MED18 siRNA, but not CcnC siRNA, reduced the binding of Pol II to the *Nos2* TSS (Figure 4K). The results obtained for the *IL6* gene were in agreement with those for *Nos2* (Figures S4C–S4E). Our data support the notion that the mediator kinase module is required for pTEFb association with the *Nos2* and *Il6* promoters. They are in line with recent findings showing a requirement of CDK8 for pTEFb recruitment, but not CDK7 (TFIIH) recruitment, at hypoxia-inducible genes (Galbraith et al., 2013).

### Concerted Action of the STAT and NF-κB Pathways in Mediator Recruitment

Our results show that NF-κB recruits histone-modifying enzymes, Pol II kinases, and the mediator kinase module. By contrast, IFN-1 and ISGF3 are necessary for TFIID and Pol II binding (Farlik et al., 2010). The STAT1 as well as STAT2 subunits of the ISGF3 complex interact functionally and physically with the mediator (Lau et al., 2003; Zakharova et al., 2003). Because the mediator bridges the initiation complex with transcriptional activators, we examined the contribution of the STAT and NF-κB pathways to its association with the *Nos2* promoter.

We first determined the presence of the MED1 and MED26 subunits because these do not always co-purify with the core mediator (Maik and Roeder, 2010). Particularly MED26-containing mediators are suggested to function without the kinase module, possibly as an alternative recruitment mechanism for pTEFb (Conaway and Conaway, 2013; Donner et al., 2010; Takahashi et al., 2011). Both MED1 and MED26 associated with the *Nos2* promoter in response to stimulation of BMDMs with hκL/IFNβ (Figures 5B and 5D). Less MED1 binding occurred after stimulation with hκL and none after IFNβ treatment alone. Binding was sensitive to IKKβ inhibition (Figure 5B) but resisted Stat1 deficiency (Figure 5C). The *IL6* gene showed a similar behavior toward MED1, although binding was less robust (Figure S4F). MED26 bound weakly to the *Nos2* TSS after IFNβ treatment alone, whereas induction by hκL was marginal. MED26 resisted IKKβ inhibition but was entirely lost in Stat1<sup>-/-</sup> macrophages (Figures 5D and 5E). STAT1-dependent MED26 recruitment, therefore, differs strikingly not only from MED1 but also from the conditions of pTEFb/CDK9 promoter binding (Figure 4F), ruling out a role of MED26 in tethering pTEFb to the *Nos2* promoter.

The data suggest that Lm signaling recruits a mediator, including MED1, MED26, and the kinase module, to the *Nos2* promoter through NF-κB-ISGF3 cooperativity. To determine whether this extends to subunits of the core mediator, binding of the tail subunit MED5/24 was examined. As for MED26 recruitment, binding was lost in Stat1<sup>-/-</sup> cells but maximally induced with STAT and NF-κB signaling together (Figures 6B and 6C). Similarly, binding of MED18, a subunit of the mediator head, required STAT1 (Figures 6D and 6E). At the *IL6* promoter,



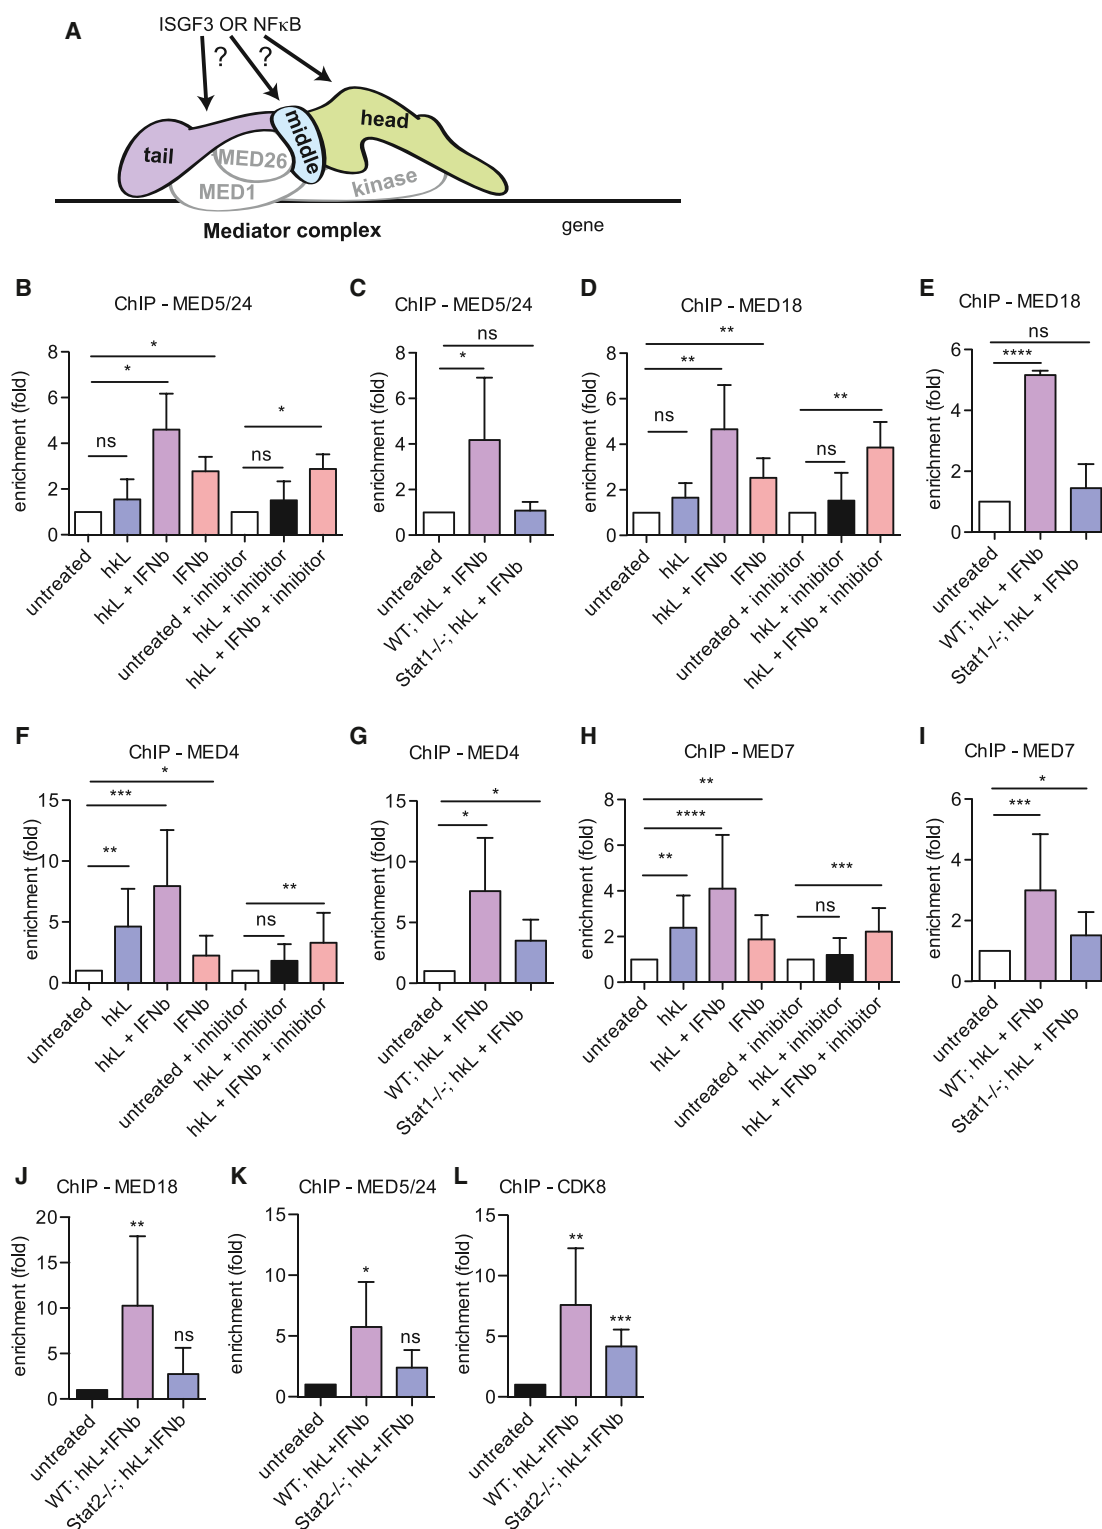

**Figure 6. Nos2 Promoter Binding of the Core Mediator**

(A) Scheme depicting the scientific question.

(B–L) WT, Stat1<sup>-/-</sup>, or Stat2<sup>-/-</sup> BMDMs were treated with hκL, IFNβ, or a combination of both with or without 10 μM IKKβ inhibitor BI605906 for 4 hr. The cells were processed for ChIP with antibodies to MED5/24 (B, C, and K), MED18 (D, E, and J), MED4 (F and G), MED7 (H and I), or CDK8 (L). Enrichment at the proximal Nos2 promoter/TSS was analyzed by qPCR. Values represent means ± SE of four or more independent biological replicates. \*p < 0.05, \*\*p < 0.01, \*\*\*p < 0.001.

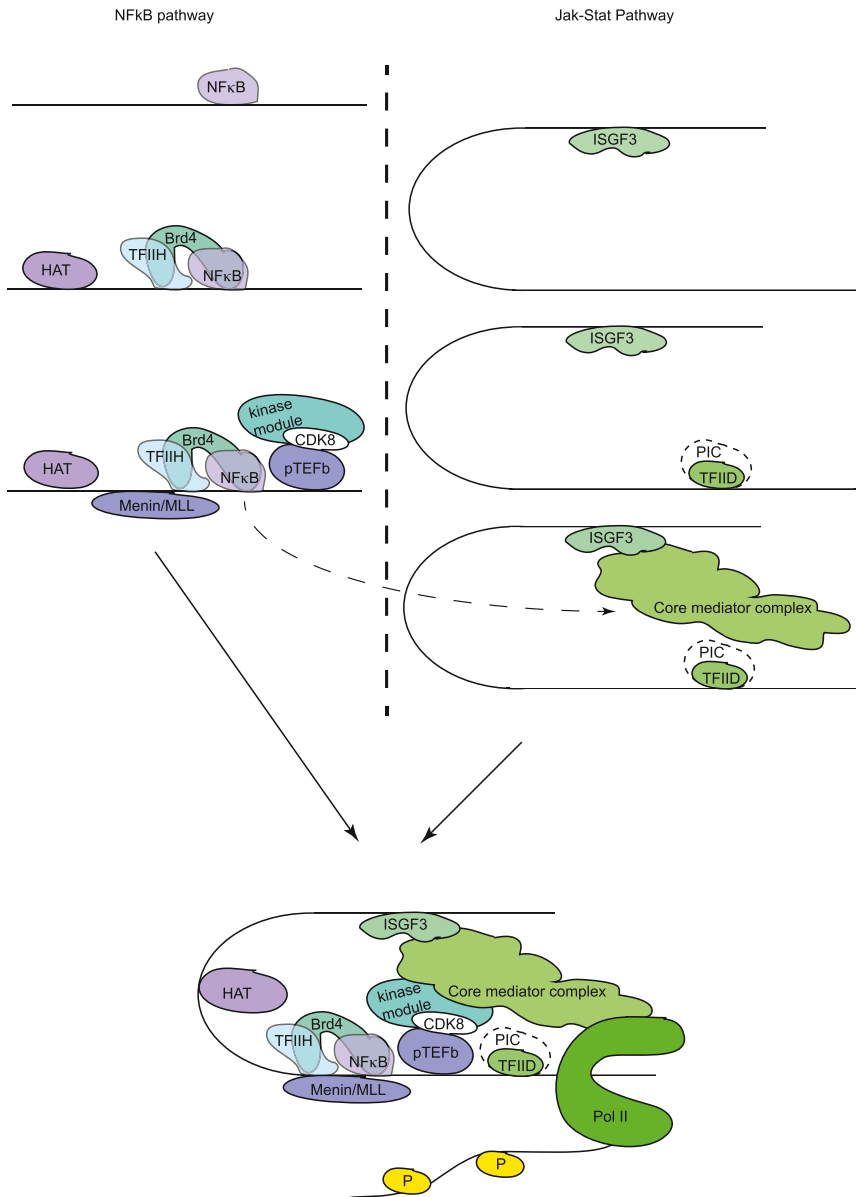

**Figure 7. Model Describing the Regulation of the *Nos2* Gene in *Listeria monocytogenes*-Infected Macrophages by the STAT and NF- $\kappa$ B Pathways**

NF- $\kappa$ B association with the *Nos2* promoter is the initial step and delivers histone-modifying enzymes (CBP and MLL1/MLL2 COMPASS-like) that produce transcription-friendly chromatin. NF- $\kappa$ B also recruits TFIID/CDK7 and pTEFb/CDK9, the kinases required for Pol II phosphorylation. NF- $\kappa$ B-dependent stable binding of TFIID/CDK7 is achieved with the help of the BET protein Brd4. pTEFb/CDK9 is recruited to the promoter via the mediator kinase module, which, like MED1, associates in complete dependence on NF- $\kappa$ B. By contrast, ISGF3 binding is essential for the formation of a pre-initiation complex, particularly the binding of TFIID. ISGF3 also provides a critical contribution to the acquisition of the core mediator and Pol II. For a further explanation, see the text and accompanying references.

promoter was ascertained by ChIP-reChIP analysis (Farlik et al., 2010; Figure S5). Both STATs were re-precipitated from MED18/MED5/24 ChIPs and, vice versa, the MED subunits from STAT1/2 ChIPs.

Mx2 and I $\kappa$ B $\alpha$  were used, respectively, as IFN $\beta$ /ISGF3 and h $\kappa$ L/NF- $\kappa$ B control genes (Figure S6). Unlike *Nos2* and *IL6*, all tested mediator subunits associated with their respective stimulus alone, although CDK8 at the *Mx2* promoter was increased further by combined h $\kappa$ L treatment. Our data support the idea that genes showing NF- $\kappa$ B/ISGF3 cooperation require both transcription factors to associate with a complete mediator complex.

## DISCUSSION

Higher eukaryotes must be able to respond rapidly to changing environmental conditions or challenges such as invading microorganisms. Transcriptional gene activation is an indispensable component of the complex cellular response to microbial infection. We studied the case of Lm infection, focusing on transcriptional synergism by NF- $\kappa$ B and ISGF3, transcription factors at the endpoints of two major antimicrobial pathways. Our work reveals that different portions of the mediator complex are involved in the NF- $\kappa$ B-dependent binding of pTEFb and in the ISGF3-dependent recruitment of Pol II to gene promoters. We are therefore able to provide a mechanistic explanation for the interaction between the two pathways (Figure 7).

In the early phase of infection, before IFN-I is produced, NF- $\kappa$ B delivers histone-modifying enzymes that produce transcription-friendly chromatin. Although the strongest acetyl transferase signal was obtained for CBP binding, an involvement of other

MED18 binding displayed a similar behavior although less dependence on NF- $\kappa$ B signaling. Again, enrichment was less robust as that seen for *Nos2* (Figures S4G and S4H).

The subunits of the mediator middle domain, MED4 and MED7, differed from the head and tail domains by their stronger dependence on NF- $\kappa$ B for binding to the *Nos2* TSS. Association was stimulated by h $\kappa$ L treatment alone and reduced by the IKK $\beta$  inhibitor (Figures 6F and 6H). However, input from IFN signaling was confirmed in Stat1<sup>-/-</sup> cells and by a low level of MED4 and MED7 association after IFN $\beta$  treatment alone (Figures 6F–6I).

Mediator core recruitment to the *Nos2* promoter in Stat2<sup>-/-</sup> macrophages was essentially as in Stat1<sup>-/-</sup> cells. The MED18 and MED5/24 subunits were missing, but the kinase/CDK8 module was present after h $\kappa$ L/IFN $\beta$  treatment (Figures 6J–6L). The simultaneous presence of the mediator and ISGF3 at the *Nos2*

HATs cannot be excluded from these findings. NF- $\kappa$ B also manages the acquisition of the Pol II CTD kinases (Farlik et al., 2010), and Brd4 helps stabilize binding of TFIIH/CDK7 to the promoter of the iNOS gene (Wienerroither et al., 2014). pTEFb/CDK9 are brought in via the mediator kinase module (Figures 4G–4K). At a later stage, signaling by the IFN- $\gamma$  receptor causes ISGF3 binding, which is essential for the acquisition of the core mediator (Figure 6), TFIID (Farlik et al., 2010), and Pol II (Farlik et al., 2010). Interestingly, recruitment of pTEFb/CDK9 by NF- $\kappa$ B draws upon the mediator kinase module before the core is recruited with the help of ISGF3. Deposition of the kinases needed for both promoter clearance and elongation prepares *Nos2*-coregulated promoters for immediate firing in response to the second activating signal, which is provided by IFN- $\gamma$ /ISGF3. It seems unlikely that such a sophisticated mechanism would be unique to a single gene (*Nos2*). Indeed, we confirmed key results with the *Nos2*-like *IL6* gene.

A detailed examination of the chromatin modifications associated with transcriptionally active chromatin revealed H4 acetylation and H3K4me3 at nucleosomes proximal to the TSS. The modifications are the result of the modifying enzyme CBP and the MLL1-2/COMPASS-like complexes, which associate with the *Nos2* promoter in the absence of IFN- $\gamma$ . Menin/MLL1-2 methyltransferase complexes are known to regulate a number of cellular genes, including Hox genes and other genes important for development (Wang et al., 2009). We now show that MLL1-2 also has a role in the innate immune response.

The H2Bub and H3K4me3 marks at the *Nos2* and *Il6* genes appear prior to the ISGF3-dependent recruitment of Pol II and depend solely on the NF- $\kappa$ B pathway. In contrast, initial recruitment of the yeast complex containing the Set H3K4 methyltransferase occurs by the Pol II-associated PAF complex, and transcription is required for H2B ubiquitination as well as for H3K4me3 catalysis. Reportedly, H3K4 trimethylation enhances transcriptional initiation through interaction with the TFIID complex (Lauberth et al., 2013; Vermeulen et al., 2007). It is attractive to speculate that NF- $\kappa$ B-dependent H3K4 trimethylation supports the ISGF3-dependent recruitment of TFIID (Farlik et al., 2010), which would represent a further example of crosstalk between the NF- $\kappa$ B and IFN pathways.

Phosphorylation of the Pol II CTD is essential for gene transcription. In Lm-infected cells, the *Nos2* promoter is occupied by the TFIIH and pTEFb complexes as a result of NF- $\kappa$ B signaling (Farlik et al., 2010; Wienerroither et al., 2014). CTD phosphorylation at both S5 and S2 occurs rapidly after promoter association of Pol II, which depends on ISGF3. Although TFIIH persistence requires the BET protein Brd4, pTEFb/CDK9 binding is independent of Brd4 (Wienerroither et al., 2014) because the mediator kinase module, particularly its CcnC/CDK8 subunits, is able to recruit pTEFb to the *Nos2* and *IL6* promoters. Our conclusion is based on the following three lines of evidence: the recruitment conditions and kinetics of CcnC/CDK8 and CDK9 are strikingly similar; antibody-mediated co-purification of CDK8 and CDK9 is possible in untreated macrophages and enhanced after stimulation with hkl/IFN $\beta$ ; and siRNA-mediated knockdown of CcnC selectively suppresses CDK9 binding and S2 phosphorylation of the Pol II CTD. The data are consistent with observations of increased CDK8 association in LPS-treated macrophages

(Serrat et al., 2014) and with previous findings on serum-responsive genes (Donner et al., 2010; Ebmeier and Taatjes, 2010).

The MED26 subunit of the mediator has been implicated in the recruitment of pTEFb to promoters (Takahashi et al., 2011). However, the conditions under which MED26 associated with the *Nos2* promoter were different from those under which pTEFb associated. In addition, MED26 is believed to act by the exchange of TFIID and pTEFb, which is not compatible with the deposition of pTEFb by the NF- $\kappa$ B pathway independently of ISGF3-mediated TFIID association. It appears, therefore, that the kinase module alone suffices for pTEFb binding. Nevertheless, recruitment of MED26 by IFN- $\gamma$  may partially explain the enhancement of NF- $\kappa$ B-mediated CDK8 binding by the cytokine.

MED26 is not the only subunit of the core mediator to depend on IFN- $\gamma$  for recruitment to the *Nos2* and *Il6* promoters. Recruitment of all core subunits we investigated also requires IFN- $\gamma$  and is, therefore, generally affected by Stat1 and Stat2 deficiency. For example, MED5/24 and MED18 are not detected at the *Nos2* promoter in Stat1-deficient macrophages treated with a combination of hkl and IFN- $\gamma$ , and a smaller amount of MED4 binds the *Nos2* TSS under these conditions. Consistent with the requirement for STAT1/2, subunits of the mediator core were induced to various degrees to bind the *Nos2* promoter after IFN- $\gamma$  treatment alone. The subunits of the middle portion of the mediator, MED4 and MED7, revealed a significant input of NF- $\kappa$ B signaling and were partially recruited by hkl treatment alone. The data show that ISGF3 and NF- $\kappa$ B interact to assemble a complete mediator at the *Nos2* TSS, with recruitment of the kinase module and MED1 completely dependent on NF- $\kappa$ B and recruitment of other subunits requiring STAT1, with various degrees of input from NF- $\kappa$ B signaling.

Two mechanistic interpretations could account for the dual requirement for ISGF3 and NF- $\kappa$ B. A preassembled mediator might require tethering by both transcription factors, or the mediator might be only partially preformed and require assembly by concerted action in a promoter-specific context. The latter interpretation is supported by studies showing that the composition of the mediator is determined by the interacting transcription factors (Ebmeier and Taatjes, 2010; Poss et al., 2013) and that about 30% of CDK8 exists independent of the core mediator complex (Knuesel et al., 2009). It is further consistent with a recent study in yeast that suggested a modular character of the mediator complex (Paul et al., 2015).

Our mechanistic studies of the *Nos2* and *Il6* promoters are relevant to a large number of genes. ChIP-seq targeting STAT1, NF- $\kappa$ B, and Pol II has defined 127 genes that are bound by both ISGF3 and NF- $\kappa$ B and that are expressed as a result of synergy between the two pathways. The ChIP-seq data also reveal that the major binding site for NF- $\kappa$ B (and ISGF3) at the *Nos2* promoter is not where we and others suspected (Farlik et al., 2010; Kleinert et al., 2004), so our understanding of transcription binding sites to other promoters may also require revision.

We describe here the mechanism for the interaction of ISGF3 and NF- $\kappa$ B at the *Nos2* and *Il6* promoters and present indications that the synergy between these transcription factors might also take place, with subtle differences in mechanism, at a number of other promoters. It is likely that variations of the mechanism

apply also to interactions between other transcription factors. The ISGF3 complex is not the only transcription factor to interact extensively with NF- $\kappa$ B. An in-depth, ChIP-seq-based analysis of virus-infected cells has shown that IRF3 also interacts with NF- $\kappa$ B (Freaney et al., 2013). We suggest that the mechanism we uncovered may represent a widespread method for higher eukaryotes to coordinate the activation of a number of genes, not only in the innate immune response but also to enable rapid and precise responses to changing environmental conditions or to challenges posed by microorganisms.

## EXPERIMENTAL PROCEDURES

### Reagents

Recombinant IFN- $\beta$  was purchased from PBL and used at 250 U/ml. The inhibitor BI605906 (a gift from Phillip Cohen) was used at 10  $\mu$ M.

### Bacteria and Infection

Growth of *Listeria monocytogenes* strain LO28 and infection of cells at MOI 20 was as described previously (Stockinger et al., 2002). Heat-killed *Listeria* was generated by incubation for 20 min at 70°C.

### Mice and Cells

Mice were housed under specific pathogen-free (SPF) conditions. C57BL/6, Stat1<sup>-/-</sup> (Durbin et al., 1996) and Stat2<sup>-/-</sup> (Park et al., 2000) mice in a C57BL/6 genetic background were sacrificed between 7–10 weeks of age. BMDMs were obtained by culture of bone marrow in L-cell-derived colony-stimulating factor 1 (Stockinger et al., 2002).

### siRNA-Mediated Gene Knockdown

siRNAs (Menin, PTIP, WDR82, MED18, and CcnC; ON-TARGETplus, Dharmacon, 6 pmol) or non-target control siRNA were mixed with Opti-MEM I medium (Gibco) and transfected into BMDMs using Lipofectamine RNAiMAX (Invitrogen) according to the manufacturer's instructions. 48 hr after transfection, the medium was replaced by fresh medium without siRNA. Another 24 hr later, cells were treated as described in the text and figure legends.

### Chromatin Immunoprecipitation, Re-ChIP, and ChIP-Seq

ChIP re-ChIP experiments were performed as described previously (Wieneroither et al., 2014). Antibodies are listed in Table S4, and primers for precipitate amplification are listed in Table S5. Unless indicated otherwise, the proximal Nos2 promoter was analyzed by amplification of a 251-bp fragment (gene coordinates Chr11: 78920580–78920830). The proximal IL-6 promoter was analyzed by amplifying a 198-bp fragment encompassing gene coordinates Chr5: 30013385–30013582. 5–10 ng of DNA precipitate was used for the generation of sequencing libraries using the KAPA library preparation kit for Illumina systems. Libraries were quantified with a Bioanalyzer dsDNA 1000 assay kit (Agilent Technologies) and a qPCR next-generation sequencing (NGS) library quantification kit (KAPA). Cluster generation and sequencing was performed with a HiSeq 2000 system with a read length of 100 nucleotides according to the manufacturer's guidelines (Illumina).

### RNA Preparation and qPCR

RNA was isolated using a NucleoSpin RNA II kit (Macherey-Nagel) and quantified using the NanoDrop method (ND1000, Peq lab). Primers for quantitative real-time PCR are given in Table S5. mRNA expression data were normalized to the housekeeping Gapdh gene and calculated relative to the respective unstimulated controls.

### Western Blot

Western blots with CDK7 (sc-529) and CDK9 (sc-484) antibodies at a dilution of 1:200 were performed as described previously (Kovarik et al., 1998). For detection, the fluorescence-labeled secondary antibodies IRDye800 and IRDye700 (LI-COR Biosciences) and an infrared imaging system (Odyssey, LI-COR Biosciences) were used.

### Microarray Analysis

Total RNA from BMDMs treated with heat-killed *Listeria*, IFN- $\beta$ , or both for 2, 4, and 8 hr was collected from three sets of independent experiments and purified with Trizol (Invitrogen) and an RNeasy mini kit (QIAGEN). Microarray analysis was performed by the Genomics Core of the Lerner Research Institute, Cleveland Clinic, using 1  $\mu$ g of total RNA and Illumina Mouse Ref-8 v2 expression bead chips. The data were normalized by the quantile method. Expression levels from untreated and treated cells were compared, and genes were selected that increased >4-fold (differential p values, <0.05; average signals in treated samples, >50).

### ChIP-Seq Analysis

Quality-based trimming was performed at the 3' end of raw reads using the "trim-fastq.pl" script of the PoPoolation toolbox, where all trimmed reads with a length of less than 40 bp were discarded. Quality-controlled reads were mapped to the mouse genome (UCSC, mm10) using Bowtie (Langmead et al., 2009), where all non-unique alignments were discarded. For post-alignment filtering, reads mapped in a proper pair were selected, and PCR duplicates were removed using SAMtools (Li et al., 2009). Peak calling was performed using MACS (Zhang et al., 2008) version 2.0.10 with default parameters for NF- $\kappa$ B, STAT1, and STAT2 samples and the "–broad" parameter for pol2 samples. A threshold of q < 0.1 was set for calling significant peaks, which were annotated within the nearest 50 kb upstream of genes (including the gene itself) using PeakAnalyzer (Salmon-Divon et al., 2010).

### DNA Motif Analysis

Overlapping areas of enrichment are merged by MACS, resulting into much wider peaks than the actual binding sites. With the PeakSplitter module of the PeakAnalyzer tool, these enriched areas were sub-divided by accurately partitioning enriched loci into finer resolution sets of individual binding sites. These sequences were used for de novo motif analysis of the peak summit regions where binding is most probable. De novo motif finding was performed by MEME (Bailey et al., 2006) on all of the significant ChIP-seq binding peaks for NF- $\kappa$ B (HkL and IFN $\beta$  treatment) and STAT1 (IFN $\beta$  treatment) samples. The parameter "minimum motif width" of MEME was set to 11 for NF- $\kappa$ B and 15 for STAT1 because this is their known motif width from the JASPAR (Sandelin et al., 2004) database. The most significant de novo computed motifs were compared with known motifs present in the JASPAR database with TOMTOM (Gupta et al., 2007). Additionally, we scanned the promoter (50 kb) and gene coordinates of Nos2 for the presence of NF- $\kappa$ B (relA), ISRE (STAT2:STAT1), and GAS (STAT1) motifs, by using their appropriate position weight matrices (PWM) from the JASPAR database. To the frequencies of each site of the PWMs we added one (to avoid zero probabilities) and calculated the probabilities of each of the four bases at each position. Sliding along each position of the DNA sequence of the iNOS gene from 50 kb upstream to the end of the gene, we calculated the fit of a position weight matrix starting at the respective position by summing the log probabilities of the bases from the beginning to the end of the PWM. We extracted fits exceeding a threshold that was specific for each transcription factor.

### GO Analysis

Enrichment of GO terms in 127 genes that had STAT1 and NF- $\kappa$ B-p65 binding sites and greater than 2-fold enrichment of Pol II binding in the co-treated sample was computed using DAVID (Jiao et al., 2012). Among the significantly enriched GO terms (EASE score <0.05 according to a modified Fisher's exact p value), similar terms were grouped with the "Functional Annotation Clustering" module of DAVID, which uses an algorithm to measure the relationship among the annotated GO terms based on the degrees of their co-association genes.

### Cooperativity between the Transcription Factors

For the transcription factors NF- $\kappa$ B\_STAT1, we computed 2x2 contingency tables according to the presence or absence of at least one peak within the upstream 50-kb region of the focal gene (including the gene coordinates). Furthermore, we divided this dataset into genes that show at least 2-fold synergistic enrichment in Pol II with double treatment versus single treatment samples and those that do not. Various hypotheses were addressed with 2x2 contingency tables and tested with chi-square tests.

### Pathway Analysis

The same list of 127 genes was analyzed for overrepresented KEGG pathways using DAVID. Again, an EASE score of less than 0.05 was used as a threshold to filter significantly overrepresented pathways.

### Statistical Analysis

Differences between mean values for qPCR results of either mRNA expression or ChIP experiments were analyzed by t test.

### ACCESSION NUMBERS

Microarray and ChIP-seq data reported in this paper have been deposited to the ArrayExpress database and are available under accession number ArrayExpress: E-MTAB-3015, E-MTAB-2972.

### SUPPLEMENTAL INFORMATION

Supplemental Information includes six figures and five tables and can be found with this article online at <http://dx.doi.org/10.1016/j.celrep.2015.06.021>.

### ACKNOWLEDGMENTS

This paper is dedicated to Karl Decker on the occasion of his 90<sup>th</sup> birthday. We thank Gijs Versteeg for valuable comments on the manuscript. Christian Seiser and Anna Sawicka are thanked for critical discussions and providing antibodies to modified histones. We gratefully acknowledge Graham Tebb for editing and improving the clarity of our manuscript. Funding was provided by the Austrian Science Fund (FWF) through grant SFB-28 (to B.S., M.M., and T.D.). S.W. and A.M. were supported by the FWF through the doctoral program Molecular Mechanisms of Cell Signaling. Next-generation sequencing was performed at the Vienna Biocenter's CSF NGS Unit (<http://www.csf.ac.at/home/>).

Received: October 17, 2014

Revised: March 20, 2015

Accepted: June 6, 2015

Published: July 2, 2015

### REFERENCES

Bailey, T.L., Williams, N., Misleh, C., and Li, W.W. (2006). MEME: discovering and analyzing DNA and protein sequence motifs. *Nucleic Acids Res.* *34*, W369–W373.

Bancerek, J., Poss, Z.C., Steinparzer, I., Sedlyarov, V., Pfaffenwimmer, T., Mikulic, I., Dölken, L., Strobl, B., Müller, M., Taatjes, D.J., and Kovarik, P. (2013). CDK8 kinase phosphorylates transcription factor STAT1 to selectively regulate the interferon response. *Immunity* *38*, 250–262.

Bogdan, C. (2001). Nitric oxide and the immune response. *Nat. Immunol.* *2*, 907–916.

Brasier, A.R., Tian, B., Jamaluddin, M., Kalita, M.K., Garofalo, R.P., and Lu, M. (2011). RelA Ser276 phosphorylation-coupled Lys310 acetylation controls transcriptional elongation of inflammatory cytokines in respiratory syncytial virus infection. *J. Virol.* *85*, 11752–11769.

Conaway, R.C., and Conaway, J.W. (2013). The Mediator complex and transcription elongation. *Biochim. Biophys. Acta* *1829*, 69–75.

Donner, A.J., Ebmeier, C.C., Taatjes, D.J., and Espinosa, J.M. (2010). CDK8 is a positive regulator of transcriptional elongation within the serum response network. *Nat. Struct. Mol. Biol.* *17*, 194–201.

Durbin, J.E., Hackenmiller, R., Simon, M.C., and Levy, D.E. (1996). Targeted disruption of the mouse Stat1 gene results in compromised innate immunity to viral disease. *Cell* *84*, 443–450.

Ebmeier, C.C., and Taatjes, D.J. (2010). Activator-Mediator binding regulates Mediator-cofactor interactions. *Proc. Natl. Acad. Sci. USA* *107*, 11283–11288.

Farlik, M., Reutterer, B., Schindler, C., Greten, F., Vogl, C., Müller, M., and Decker, T. (2010). Nonconventional initiation complex assembly by STAT

and NF-kappaB transcription factors regulates nitric oxide synthase expression. *Immunity* *33*, 25–34.

Freaney, J.E., Kim, R., Mandhana, R., and Horvath, C.M. (2013). Extensive cooperation of immune master regulators IRF3 and NFkB in RNA Pol II recruitment and pause release in human innate antiviral transcription. *Cell Rep.* *4*, 959–973.

Galbraith, M.D., Allen, M.A., Bensard, C.L., Wang, X., Schwinn, M.K., Qin, B., Long, H.W., Daniels, D.L., Hahn, W.C., Dowell, R.D., and Espinosa, J.M. (2013). HIF1A employs CDK8-mediator to stimulate RNAPII elongation in response to hypoxia. *Cell* *153*, 1327–1339.

Gupta, S., Stamatoyannopoulos, J.A., Bailey, T.L., and Noble, W.S. (2007). Quantifying similarity between motifs. *Genome Biol.* *8*, R24.

Hamon, M., Bierne, H., and Cossart, P. (2006). *Listeria monocytogenes*: a multifaceted model. *Nat. Rev. Microbiol.* *4*, 423–434.

Jamieson, A.M., Farlik, M., and Decker, T. (2012). How Stats Interact with the Molecular Machinery of Transcriptional Activation, T. Decker and M. Müller, eds. (Springer), pp. 65–89.

Jang, M.K., Mochizuki, K., Zhou, M., Jeong, H.-S., Brady, J.N., and Ozato, K. (2005). The bromodomain protein Brd4 is a positive regulatory component of P-TEFb and stimulates RNA polymerase II-dependent transcription. *Mol. Cell* *19*, 523–534.

Jiao, X., Sherman, B.T., Huang, W., Stephens, R., Baseler, M.W., Lane, H.C., and Lempicki, R.A. (2012). DAVID-WS: a stateful web service to facilitate gene/protein list analysis. *Bioinformatics* *28*, 1805–1806.

Kawai, T., and Akira, S. (2009). The roles of TLRs, RLRs and NLRs in pathogen recognition. *Int. Immunol.* *21*, 317–337.

Kleinert, H., Pautz, A., Linker, K., and Schwarz, P.M. (2004). Regulation of the expression of inducible nitric oxide synthase. *Eur. J. Pharmacol.* *500*, 255–266.

Knuesel, M.T.M., Meyer, K.D.K., Donner, A.J.A., Espinosa, J.M.J., and Taatjes, D.J.D. (2009). The human CDK8 subcomplex is a histone kinase that requires Med12 for activity and can function independently of mediator. *Mol. Cell. Biol.* *29*, 650–661.

Kovarik, P., Stoiber, D., Novy, M., and Decker, T. (1998). Stat1 combines signals derived from IFN-γ and LPS receptors during macrophage activation. *EMBO J.* *17*, 3660–3668.

Langmead, B., Trapnell, C., Pop, M., and Salzberg, S.L. (2009). Ultrafast and memory-efficient alignment of short DNA sequences to the human genome. *Genome Biol.* *10*, R25.

Lau, J.F., Nusinzon, I., Burakov, D., Freedman, L.P., and Horvath, C.M. (2003). Role of metazoan mediator proteins in interferon-responsive transcription. *Mol. Cell. Biol.* *23*, 620–628.

Lauberth, S.M., Nakayama, T., Wu, X., Ferris, A.L., Tang, Z., Hughes, S.H., and Roeder, R.G. (2013). H3K4me3 interactions with TAF3 regulate preinitiation complex assembly and selective gene activation. *Cell* *152*, 1021–1036.

Levy, D.E., and Darnell, J.E., Jr. (2002). Stats: transcriptional control and biological impact. *Nat. Rev. Mol. Cell Biol.* *3*, 651–662.

Li, H., Handsaker, B., Wysoker, A., Fennell, T., Ruan, J., Homer, N., Marth, G., Abecasis, G., and Durbin, R.; 1000 Genome Project Data Processing Subgroup (2009). The Sequence Alignment/Map format and SAMtools. *Bioinformatics* *25*, 2078–2079.

Luo, Z., Lin, C., and Shilatifard, A. (2012). The super elongation complex (SEC) family in transcriptional control. *Nat. Rev. Mol. Cell Biol.* *13*, 543–547.

Malik, S., and Roeder, R.G. (2010). The metazoan Mediator co-activator complex as an integrative hub for transcriptional regulation. *Nat. Rev. Genet.* *11*, 761–772.

Mancuso, G., Gambuzza, M., Midiri, A., Biondo, C., Papisergi, S., Akira, S., Teti, G., and Beninati, C. (2009). Bacterial recognition by TLR7 in the lysosomes of conventional dendritic cells. *Nat. Immunol.* *10*, 587–594.

McCaffrey, R.L., Fawcett, P., O'Riordan, M., Lee, K.-D., Havell, E.A., Brown, P.O., and Portnoy, D.A. (2004). A specific gene expression program triggered by Gram-positive bacteria in the cytosol. *Proc. Natl. Acad. Sci. USA* *101*, 11386–11391.



- O’Riordan, M., and Portnoy, D.A. (2002). The host cytosol: front-line or home front? *Trends Microbiol.* *10*, 361–364.
- Park, C., Li, S., Cha, E., and Schindler, C. (2000). Immune response in Stat2 knockout mice. *Immunity* *13*, 795–804.
- Paul, E., Zhu, Z.I., Landsman, D., and Morse, R.H. (2015). Genome-wide association of mediator and RNA polymerase II in wild-type and mediator mutant yeast. *Mol. Cell. Biol.* *35*, 331–342.
- Poss, Z.C., Ebmeier, C.C., and Taatjes, D.J. (2013). The Mediator complex and transcription regulation. *Crit. Rev. Biochem. Mol. Biol.* *48*, 575–608.
- Qiao, Y., Giannopoulou, E.G., Chan, C.H., Park, S.-H., Gong, S., Chen, J., Hu, X., Elemento, O., and Ivashkiv, L.B. (2013). Synergistic activation of inflammatory cytokine genes by interferon- $\gamma$ -induced chromatin remodeling and toll-like receptor signaling. *Immunity* *39*, 454–469.
- Salmon-Divon, M., Dvinge, H., Tammoja, K., and Bertone, P. (2010). PeakAnalyzer: genome-wide annotation of chromatin binding and modification loci. *BMC Bioinformatics* *11*, 415–427.
- Sandelin, A., Alkema, W., Engström, P., Wasserman, W.W., and Lenhard, B. (2004). JASPAR: an open-access database for eukaryotic transcription factor binding profiles. *Nucleic Acids Res.* *32*, D91–D94.
- Sauer, J.-D., Sotelo-Troha, K., von Moltke, J., Monroe, K.M., Rae, C.S., Brubaker, S.W., Hyodo, M., Hayakawa, Y., Woodward, J.J., Portnoy, D.A., and Vance, R.E. (2011). The N-ethyl-N-nitrosourea-induced Goldenticket mouse mutant reveals an essential function of Sting in the in vivo interferon response to *Listeria monocytogenes* and cyclic dinucleotides. *Infect. Immun.* *79*, 688–694.
- Seki, E., Tsutsui, H., Tsuji, N.M., Hayashi, N., Adachi, K., Nakano, H., Futatsugi-Yumikura, S., Takeuchi, O., Hoshino, K., Akira, S., et al. (2002). Critical roles of myeloid differentiation factor 88-dependent proinflammatory cytokine release in early phase clearance of *Listeria monocytogenes* in mice. *J. Immunol.* *169*, 3863–3868.
- Serrat, N., Sebastian, C., Pereira-Lopes, S., Valverde-Estrella, L., Lloberas, J., and Celada, A. (2014). The response of secondary genes to lipopolysaccharides in macrophages depends on histone deacetylase and phosphorylation of C/EBP $\beta$ . *J. Immunol.* *192*, 418–426.
- Shilatifard, A. (2012). The COMPASS family of histone H3K4 methylases: mechanisms of regulation in development and disease pathogenesis. *Annu. Rev. Biochem.* *81*, 65–95.
- Smith, E., Lin, C., and Shilatifard, A. (2011). The super elongation complex (SEC) and MLL in development and disease. *Genes Dev.* *25*, 661–672.
- Soares, L.M., and Buratowski, S. (2013). Histone Crosstalk: H2Bub and H3K4 Methylation. *Mol. Cell* *49*, 1019–1020.
- Stockinger, S., Materna, T., Stoiber, D., Bayr, L., Steinborn, R., Kolbe, T., Unger, H., Chakraborty, T., Levy, D.E., Müller, M., and Decker, T. (2002). Production of type I IFN sensitizes macrophages to cell death induced by *Listeria monocytogenes*. *J. Immunol.* *169*, 6522–6529.
- Takahashi, H., Parmely, T.J., Sato, S., Tomomori-Sato, C., Banks, C.A.S., Kong, S.E., Szutorisz, H., Swanson, S.K., Martin-Brown, S., Washburn, M.P., et al. (2011). Human mediator subunit MED26 functions as a docking site for transcription elongation factors. *Cell* *146*, 92–104.
- Vermeulen, M., Mulder, K.W., Denissov, S., Pijnappel, W.W.M.P., van Schaik, F.M.A., Varier, R.A., Baltissen, M.P.A., Stunnenberg, H.G., Mann, M., and Timmers, H.T.M. (2007). Selective anchoring of TFIID to nucleosomes by trimethylation of histone H3 lysine 4. *Cell* *131*, 58–69.
- Wang, P., Lin, C., Smith, E.R., Guo, H., Sanderson, B.W., Wu, M., Gogol, M., Alexander, T., Seidel, C., Wiedemann, L.M., et al. (2009). Global analysis of H3K4 methylation defines MLL family member targets and points to a role for MLL1-mediated H3K4 methylation in the regulation of transcriptional initiation by RNA polymerase II. *Mol. Cell. Biol.* *29*, 6074–6085.
- Wienerroither, S., Rauch, I., Rosebrock, F., Jamieson, A.M., Bradner, J., Muhar, M., Zuber, J., Müller, M., and Decker, T. (2014). Regulation of NO synthesis, local inflammation, and innate immunity to pathogens by BET family proteins. *Mol. Cell. Biol.* *34*, 415–427.
- Woodward, J.J., Iavarone, A.T., and Portnoy, D.A. (2010). c-di-AMP secreted by intracellular *Listeria monocytogenes* activates a host type I interferon response. *Science* *328*, 1703–1705.
- Yang, Z., Yik, J.H.N., Chen, R., He, N., Jang, M.K., Ozato, K., and Zhou, Q. (2005). Recruitment of P-TEFb for stimulation of transcriptional elongation by the bromodomain protein Brd4. *Mol. Cell* *19*, 535–545.
- Zakharova, N., Lyman, E.S., Yang, E., Malik, S., Zhang, J.J., Roeder, R.G., and Darnell, J.E., Jr. (2003). Distinct transcriptional activation functions of STAT1 $\alpha$  and STAT1 $\beta$  on DNA and chromatin templates. *J. Biol. Chem.* *278*, 43067–43073.
- Zhang, Y., Liu, T., Meyer, C.A., Eeckhoute, J., Johnson, D.S., Bernstein, B.E., Nussbaum, C., Myers, R.M., Brown, M., Li, W., and Liu, X.S. (2008). Model-based analysis of ChIP-Seq (MACS). *Genome Biol.* *9*, R137.

Cell Reports

Supplemental Information

**Cooperative Transcriptional Activation  
of Antimicrobial Genes by STAT and NF- $\kappa$ B Pathways  
by Concerted Recruitment of the Mediator Complex**

Sebastian Wienerroither, Priyank Shukla, Matthias Farlik, Andrea Majoros, Bernadette Stych, Claus Vogl, HyeonJoo Cheon, George R. Stark, Birgit Strobl, Mathias Müller, and Thomas Decker

**Figure S1**

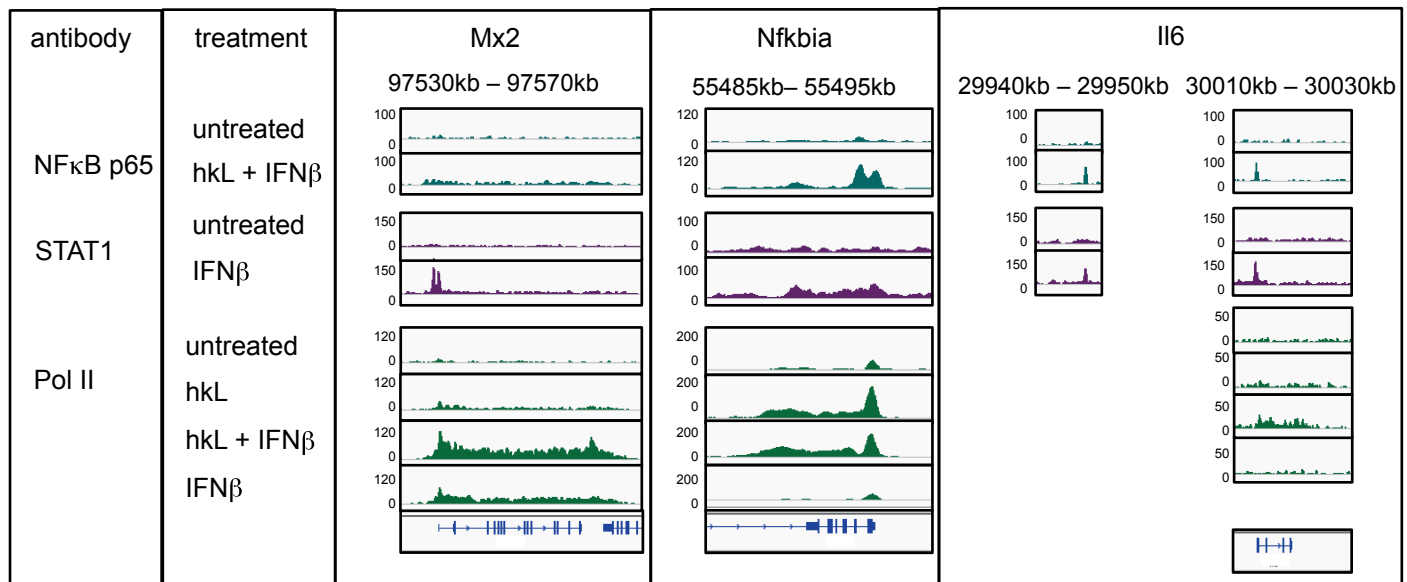

**Figure S2**

**a**

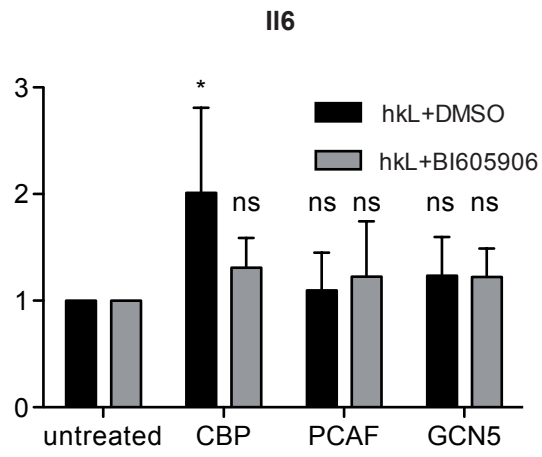

**b**

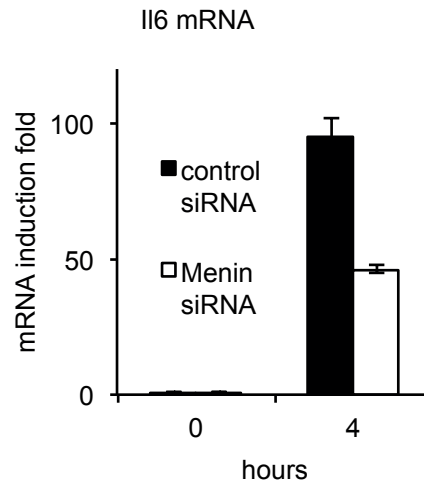

**c**

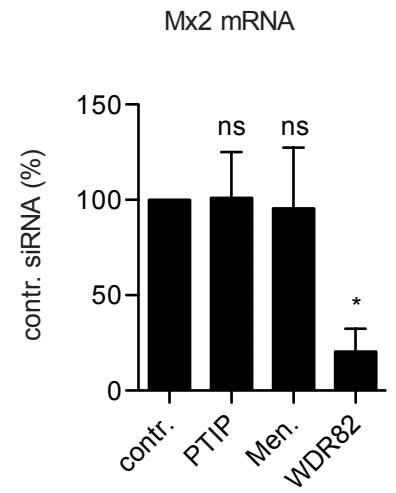

**d**

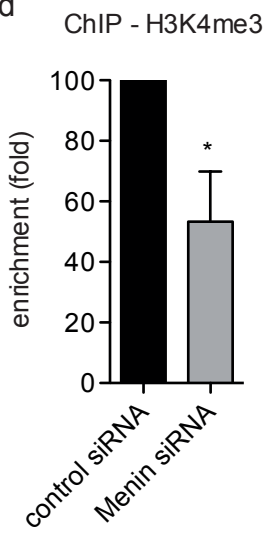

**e**

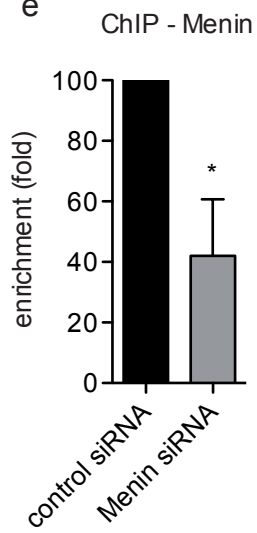

**f**

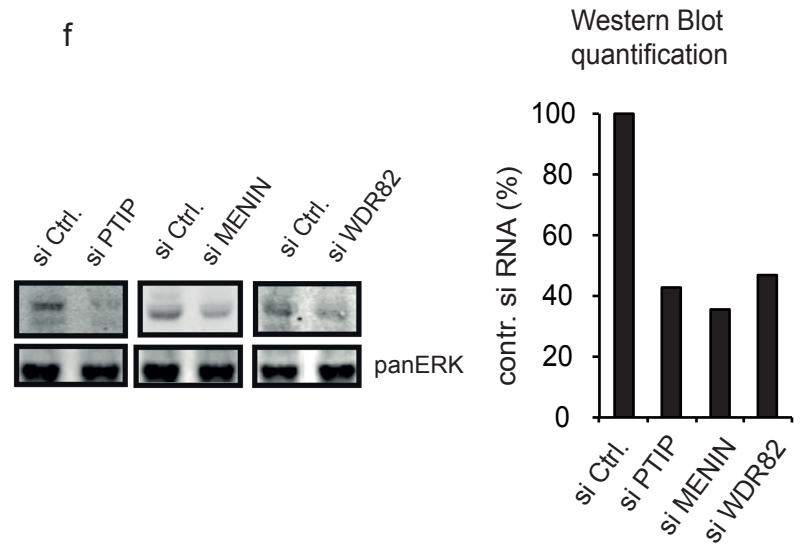

**Figure S3**

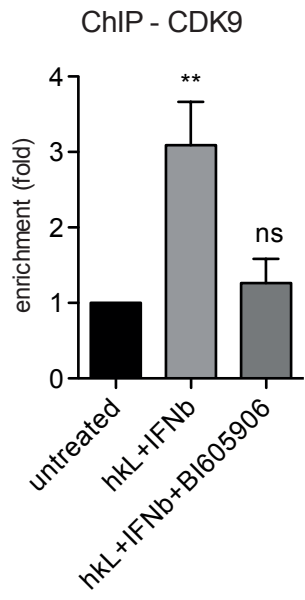



Figure S4

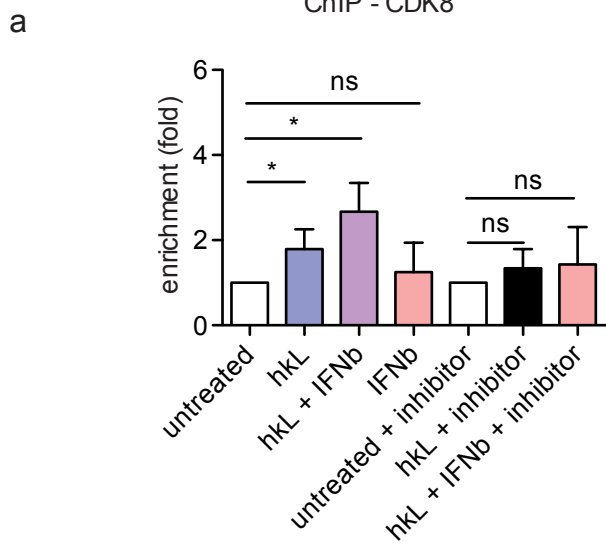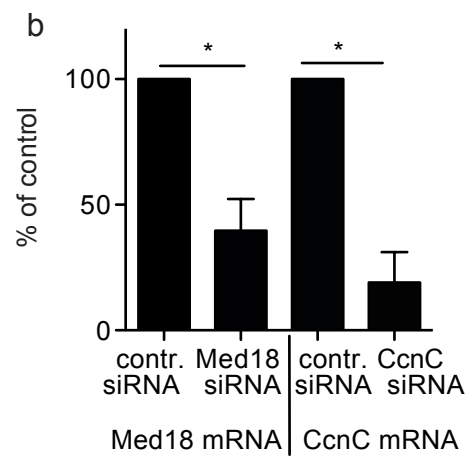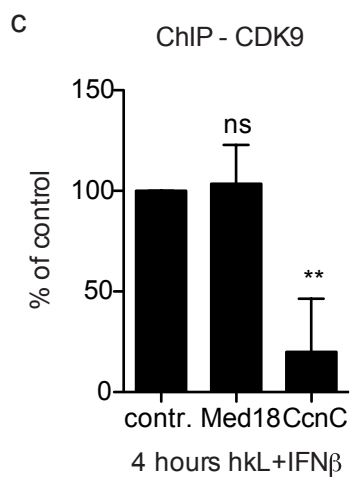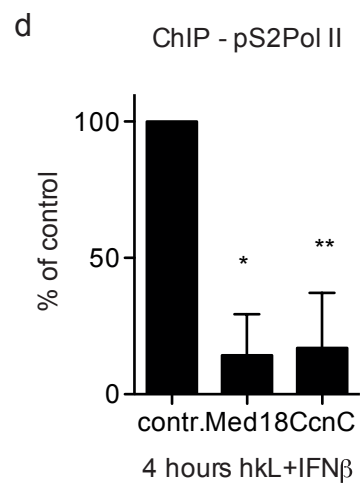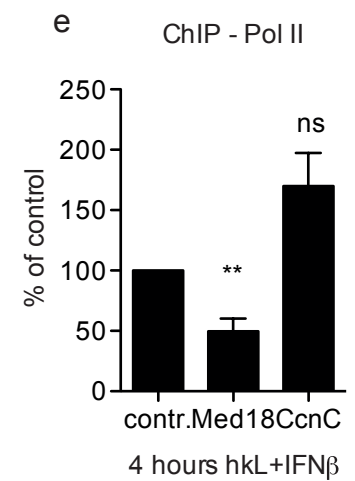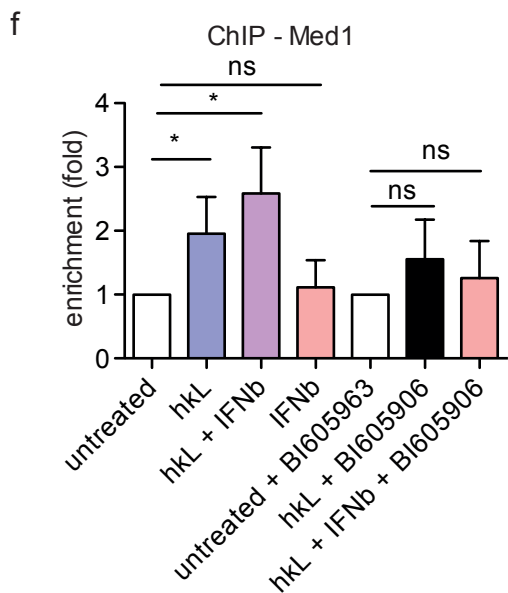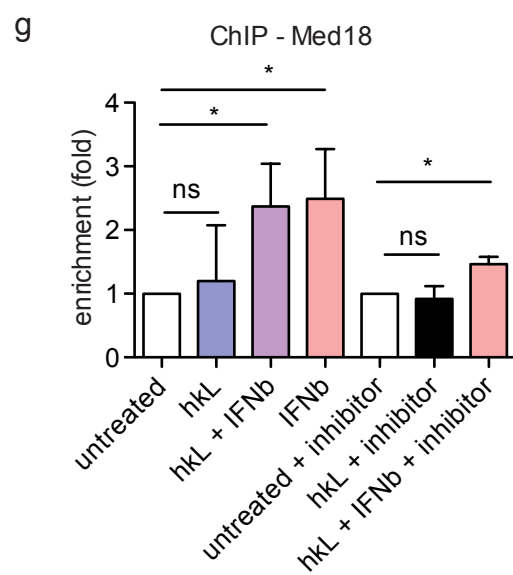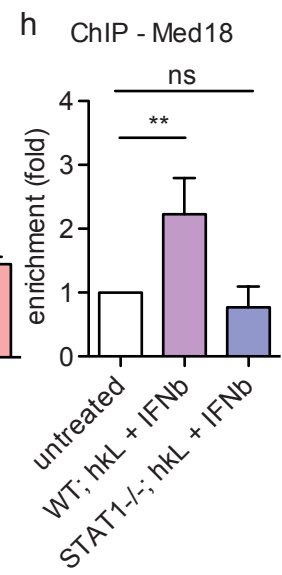

**Figure S5**

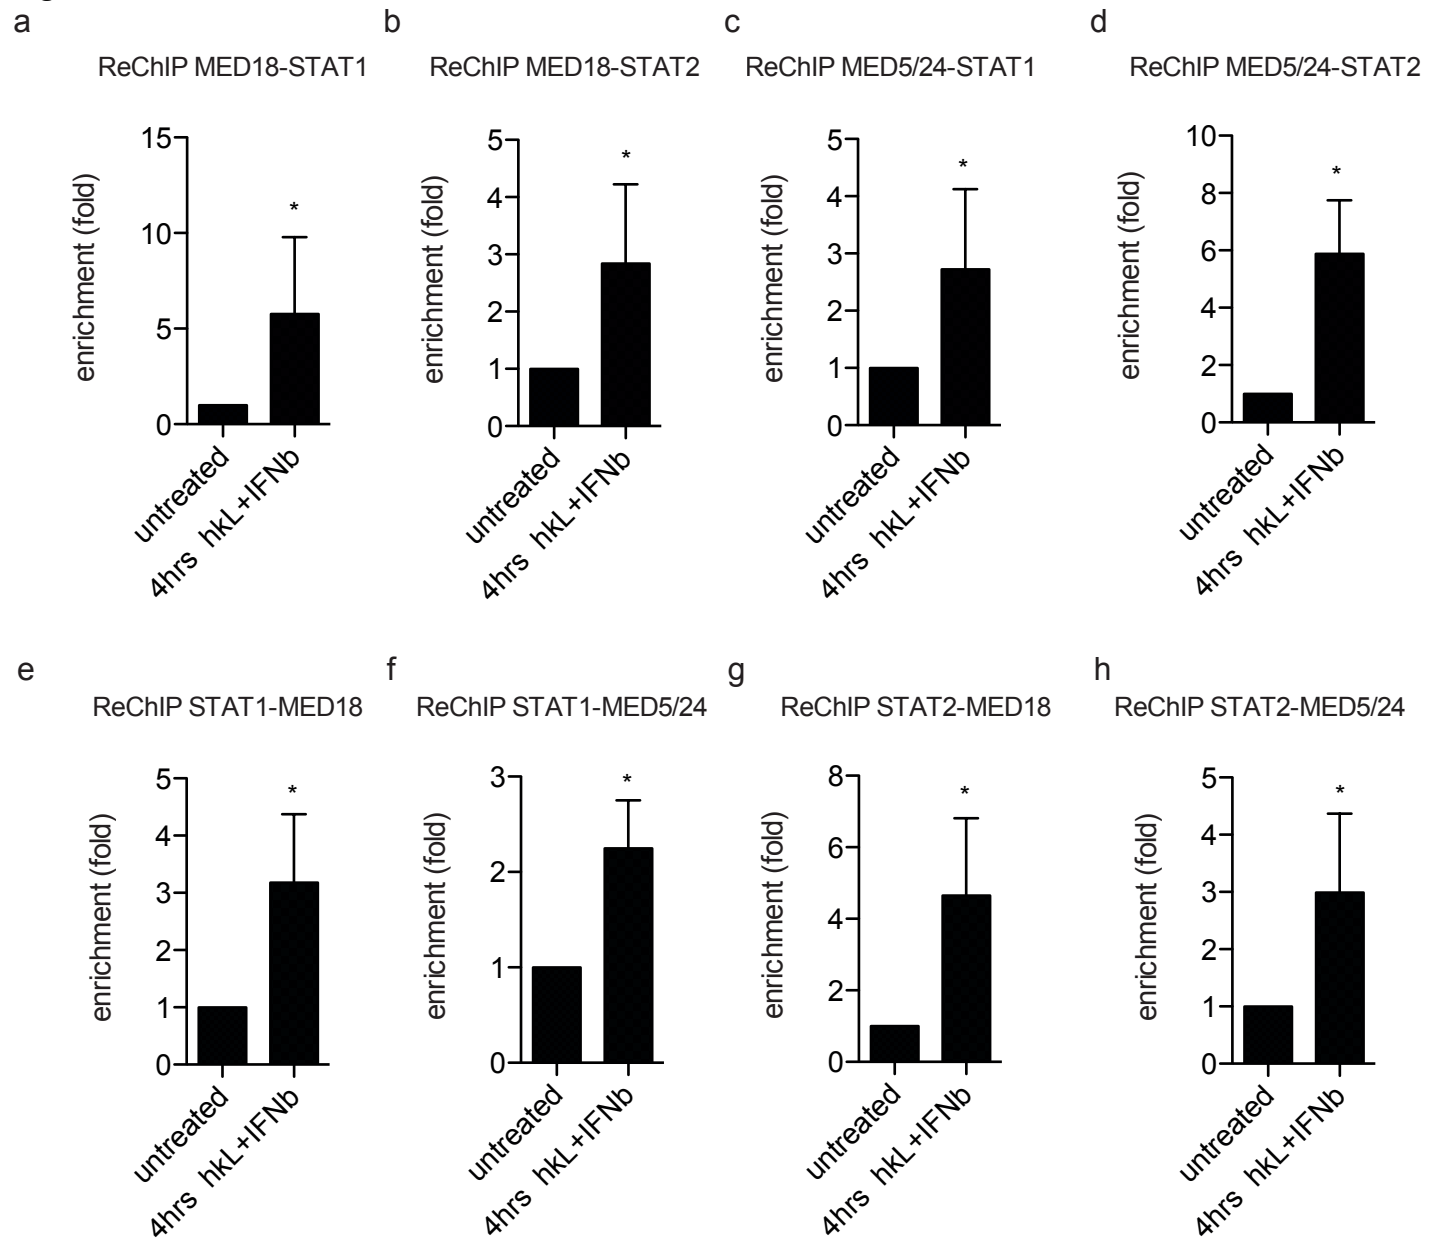

**Figure S6**

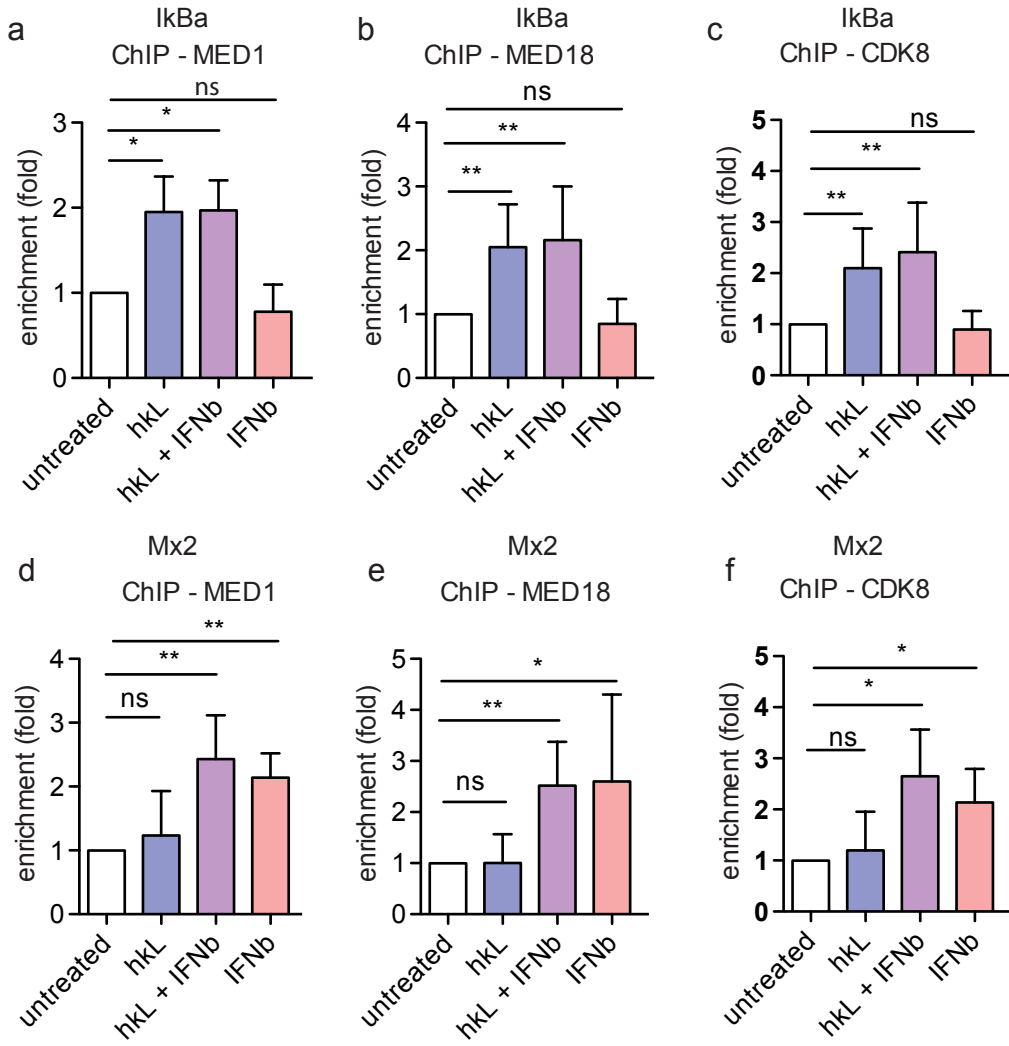

## Supplementary figure legends

### **Figure S1, related to figure 2: ChIP-Seq analysis NF $\kappa$ B and ISGF3 target genes.**

BMDMs were treated with heat-killed Listeria (hkL), IFN $\beta$ , or with a combination of both for 4 hours. For STAT1 ChIP treatment was with IFN $\beta$  for two hours. Cells were processed for ChIP with indicated antibodies (Pol II, NF $\kappa$ Bp65, STAT1), followed by next generation sequencing of the precipitate (ChIP-Seq). Genome browser views of the results obtained for the Mx2 (left panel), Nf $\kappa$ bia (middle panel) and Il6 (right panel) genes are shown.

**Figure S2, related to figure 3: Histone modifiers at the Il6 promoter.** (a) BMDMs were treated with hkL with or without 10 $\mu$ M IKK $\beta$  inhibitor BI605906 for 4 hours followed by ChIP with antibodies to CBP, PCAF and GCN5. DNA encompassing the TSS was amplified. (b-e) BMDM were transfected with Menin siRNA and treated with hkL+IFN $\beta$  for 4 hours. Il6 (b) and Mx2 (c) mRNA expression was analyzed by Q-PCR (b, c), H3K4me3 modification (d) and Menin binding (e) were determined by ChIP, amplifying the region encompassing the TSS. (f) western blot to assess the knock-down efficiency (right panel shows the quantification by densitometry).

**Figure S3, related to figure 4: CDK9 recruitment to the Il6 promoter.** BMDMs were treated with hkL+IFN $\beta$  for 4 hours with (dark grey) or without (light grey) 10  $\mu$ M IKK $\beta$  inhibitor BI605906 followed by ChIP using antibody to CDK9. DNA encompassing the TSS was amplified

**Figure S4, related to figure 4, 5 and 6: Knockdown of MED18 and CcnC.** (a) WT BMDMs were treated with hkL or IFN $\beta$  or a combination of both for 4 hours, with and without 10  $\mu$ M IKK $\beta$  inhibitor BI605906 as indicated, followed by ChIP analysis with antibody to CDK8 and Q-PCR for promoter region of Il6. (b) Knockdown was performed in BMDMs using siRNA as described in material and methods. The cells were lysed and mRNA analysis (b) was performed to analyze the knockdown efficiency. A knockdown of MED18 or CcnC in BMDMs was performed and cells were treated with hkL and IFN $\beta$  for 4 hours followed by ChIP with antibodies to CDK9 (c), pS2Pol II (d) and Pol II (e). WT and STAT1  $-/-$  BMDMs were treated with hkL or IFN $\beta$  or a combination of both for 4 hours, with and without 10 $\mu$ M IKK $\beta$  inhibitor BI605906 as indicated, followed by ChIP analysis with antibody to MED1 (f) and MED18 (g, h) and Q-PCR for promoter region of Il6. For all ChIP experiments DNA encompassing the TSS was amplified. Values represent means and standard errors of at least three independent biological replicates. \*, P<0,05; \*\*, P<0,01; \*\*\*, P<0,001

**Figure S5, related to figure 6. ChIP-re-ChIP analysis of Stat1, Stat2 and core mediator binding to the Nos2 promoter.** WT BMDMs were treated with hκL and IFNβ for 4 hours, followed by ChIP with the antibodies to MED18 (a, b), MED5/24 (c, d), STAT1 (e, f), and STAT2 (g, h). The samples were re-precipitated with STAT1 (a, c), STAT2 (b, d), MED18 (e, g) and MED5/24 (f, h). The re-precipitates were analyzed by Q-PCR, amplifying the 209bp of the Nos2 promoter including the IFN response region (imperfect ISRE sequences at -952/-940 and -924/-911 with respect to the TSS).

**Figure S6, related to figures 4, 5 and 6: Mediator subunit recruitment to the IκBα and Mx2 genes.** BMDMs were treated with hκL+IFNβ for 4 hours followed by ChIP analysis with antibodies to MED1, MED18 and CDK8 (a,b). IκBα (a) and Mx2 proximal promoter regions (b) including the TSS were analyzed for protein binding. Values represent means and standard errors of at least four independent biological replicates. \*, P<0,05; \*\*, P<0,01; \*\*\*, P<0,001



| Gene          | NF $\kappa$ B binding site | STAT1 binding site |
|---------------|----------------------------|--------------------|
| 1190002H23Rik | -                          | -                  |
| 1190003J15Rik | -                          | -                  |
| Adora2b       | +                          | -                  |
| Arg2          | -                          | -                  |
| Ccl7          | +                          | +                  |
| Ccr12         | +                          | +                  |
| Cd40          | -                          | +                  |
| Cd83          | +                          | +                  |
| Ch25h         | +                          | +                  |
| Cxcl9         | -                          | +                  |
| Dgka          | -                          | -                  |
| Dusp2         | -                          | +                  |
| Edn1          | +                          | +                  |
| Egr1          | -                          | -                  |
| Gpr109a       | -                          | -                  |
| Hdc           | -                          | +                  |
| Il10          | +                          | +                  |
| Il15ra        | +                          | +                  |
| Il19          | -                          | -                  |
| Il1a          | -                          | -                  |
| Il1rn         | +                          | +                  |
| Il27          | +                          | +                  |
| Il6           | +                          | +                  |
| Indo          | -                          | -                  |
| Inhba         | +                          | -                  |
| Irf8          | -                          | +                  |
| Mxd1          | -                          | +                  |
| Nos2          | +                          | +                  |
| Nrg1          | -                          | +                  |
| Prokr1        | -                          | -                  |
| Ptx3          | -                          | -                  |
| S100a8        | -                          | -                  |
| Serpinb2      | -                          | +                  |
| Slamf1        | +                          | +                  |
| Slc28a2       | +                          | +                  |
| Slc6a4        | -                          | -                  |
| Tagap         | +                          | +                  |
| Thbs1         | -                          | -                  |
| Tmtc2         | +                          | +                  |
| Tpbp          | -                          | -                  |
| Upp1          | -                          | -                  |
| Vcam1         | -                          | -                  |

**Table S1, related to figures 1 and 2:** mRNAs displaying synergistic induction by type I IFN and heat-killed *Listeria* (hKL) as determined by microarray, related to figures 1 and 2. The presence of binding sites for NF $\kappa$ B/p65 and STAT1 within 50kB of the transcription start (TSS) of the corresponding genes was determined by ChIP-Seq. For further explanation see text.

a) Contingency tables were computed for the NF $\kappa$ B\_STAT1 pair, depending on the presence or absence of at least one CHIP-Seq peak 50kb upstream of the transcription start or within the gene, and on the presence or absence of at least 2-fold synergistic enrichment of Pol II with the double treatment versus single treatment samples.

| NF $\kappa$ B | STAT1   | Pol II syn. | Pol II not syn. | Total |
|---------------|---------|-------------|-----------------|-------|
| absent        | absent  | 103         | 26950           | 27053 |
| present       | absent  | 35          | 568             | 603   |
| absent        | present | 123         | 5964            | 6087  |
| present       | present | 127         | 1089            | 1216  |
| Total         |         | 388         | 34571           | 34959 |

b) Many hypotheses tests are possible with this table; the two used in the main text are presented. For genes with Pol II synergism, the presence or absence of NF $\kappa$ B and STAT1 peaks produce the following 2x2 contingency table:

|                       | STAT1 absent | STAT1 present | Total |
|-----------------------|--------------|---------------|-------|
| NF $\kappa$ B absent  | 103          | 123           | 226   |
| NF $\kappa$ B present | 35           | 127           | 162   |
| Total                 | 138          | 250           | 388   |

c) Analysis of genes without and with synergy for the presence or absence of concomitant NF $\kappa$ B and STAT1 peaks results in the following 2x2 contingency table:

|                                      | Pol II syn. | Pol II not syn. | Total |
|--------------------------------------|-------------|-----------------|-------|
| NF $\kappa$ B or STAT1 absent        | 261         | 33482           | 33743 |
| both NF $\kappa$ B and STAT1 present | 127         | 1089            | 1216  |
| Total                                | 388         | 34571           | 34959 |

**Table S2, related to figure 2.** Association of STAT1 and NF $\kappa$ B binding with synergistic gene induction by heat-killed *L. monocytogenes* and type I IFN.

**Table S3, related to figure 2:** GO-analysis and KEGG pathway of 127 genes with STAT1 and NF $\kappa$ B binding sites showing synergistic NF $\kappa$ B and ISGF3 activity according to RNA polymerase II signals in CHIP-Seq. Untreated cells are compared with cells subjected to single IFN $\beta$  or hkL treatment, or with cells treated with combined hkL+IFN $\beta$ .

| Antibody  | Catalog number                  | Company    |
|-----------|---------------------------------|------------|
| STAT1     | sc-346                          | Santa Cruz |
| CDK9      | sc-484                          | Santa Cruz |
| H3        | ab1791                          | Abcam      |
| H4ac      | 06-866                          | Upstate    |
| H4K5ac    | Kind gift from Christian Seiser |            |
| H4K8ac    | Kind gift from Christian Seiser |            |
| H4K12ac   | Kind gift from Christian Seiser |            |
| H4K16ac   | Kind gift from Christian Seiser |            |
| Med1      | sc-5334                         | Santa Cruz |
| Med4      | Ab129170                        | Abcam      |
| Med7      | sc-12457                        | Santa Cruz |
| CDK8      | sc-1521                         | Santa Cruz |
| Med18     | A300-777A                       | Bethyl     |
| Med24     | A301-472A                       | Bethyl     |
| Med26     | sc-48776                        | Santa Cruz |
| CcnC      | sc-1061                         | Santa Cruz |
| Pol II    | sc-899                          | Santa Cruz |
| pS2Pol II | A300-654A                       | Bethyl     |
| CBP       | sc-369                          | Santa Cruz |
| GCN5      | sc-20698x                       | Santa Cruz |
| PCAF      | sc-8999x                        | Santa Cruz |

**Table S4, related to figures 2-6.** Antibodies used for ChIP

Q-PCR

|           |                           |
|-----------|---------------------------|
| Nos2 for  | GCTTGCCCCAACAGGAGAAG      |
| Nos2 rev  | GCTGCCCGGAAGGTTTGTAC      |
| Il6 for   | CTGCAAGAGACTTCCATCCAG     |
| Il6 rev   | AGTGGTATAGACAGGTCTGTTGG   |
| Il1rn for | GTGCTACTGGGGCTCATTTGT     |
| Il1rn rev | GGAGTAAGAGGACACTTGCGAAT   |
| Ccl2 for  | CCCCGGACGATGAATATGATG     |
| Ccl2 rev  | CACCAAGATAAACACCGCCAG     |
| HPRT for  | GTTGGATACAGGCCAGACTTTGTTG |
| HPRT rev  | GAGGGTAGGCTGGCCTATTGGCT   |

ChIP

|                      |                             |
|----------------------|-----------------------------|
| Nos2 prx for         | GGTCCCAGTTTTGAAGTGACTIONACG |
| Nos2 prx rev         | GTTGTGACCCTGGCAGCAG         |
| Nos2 dis for         | CCAACACTATTGAGGCCACACAC     |
| Nos2 dis rev         | GCTTCCAATAAAGCATTACACA      |
| Mx2 for              | ACCCAGCCAAGGCCCCCTTA        |
| Mx2 rev              | GCAGCTGCCAGGGCTCAGAC        |
| IkBα for             | AAGAAGGGTTCTTGCAGAGGGCT     |
| IkBα rev             | TCGTCCTCCACTGAGAAGCCTAAA    |
| Il6 for              | ATCCAGTTGCCTTCTTGGGACTGA    |
| Il6 rev              | ATCAGTTTCACAGCCTACCCACCT    |
| Nos2 30kb distal for | CTGGAGTCTGTTCTTCTGACTG      |
| Nos2 30kb distal rev | CAAGAGGCCACAAGAGAAT         |

**Table S5, related to figures 1-6.** Primer sequences used for gene expression and ChIP analysis by Q-PCR in 5' -> 3' polarity
